# Supplementary material for: Network-Guided Analysis of Genes with Altered Somatic Copy Number and Gene Expression Reveals Pathways Commonly Perturbed in Metastatic Melanoma
Source: PubMed Central journal article supplement (PMC3072964; doi:10.1371/journal.pone.0018369), 2011-04-08

LAU-Me280 - CGH array

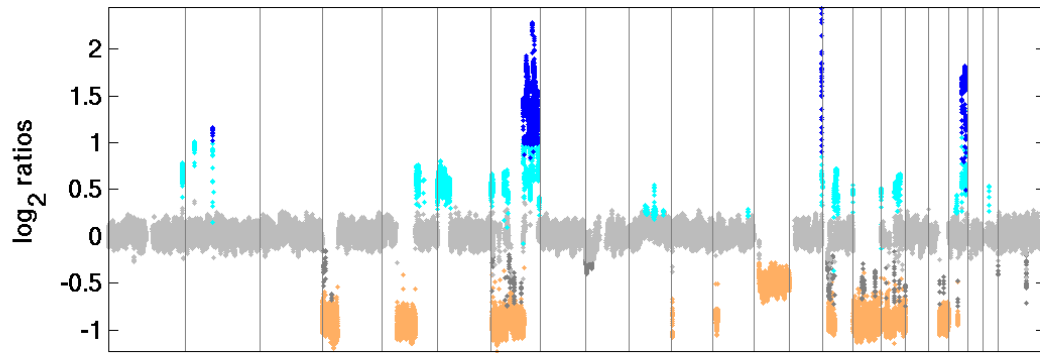

LAU-Me280 - SNP array

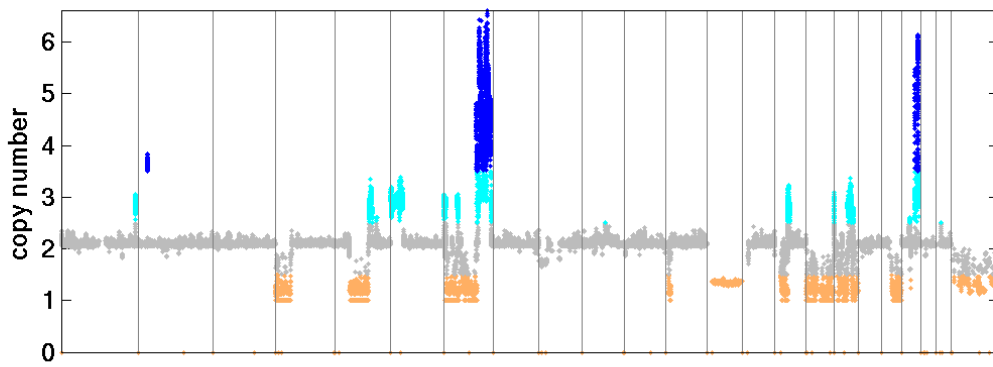

LAU-Me280 - LOH from SNP array

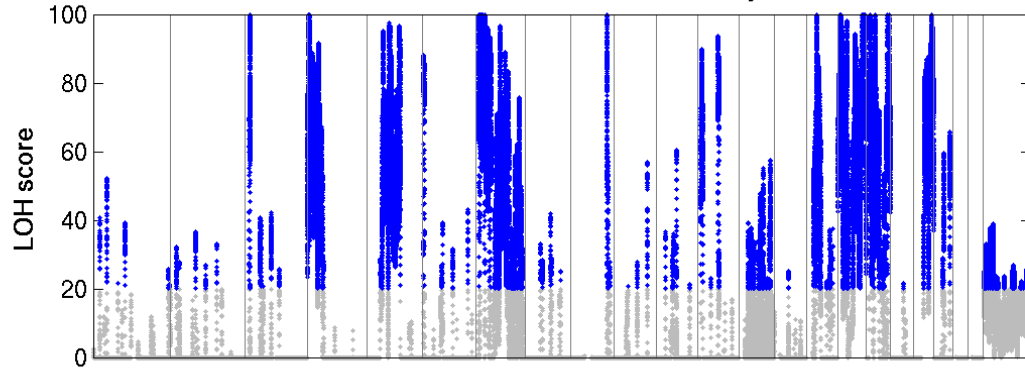

LAU-Me246 - CGH array

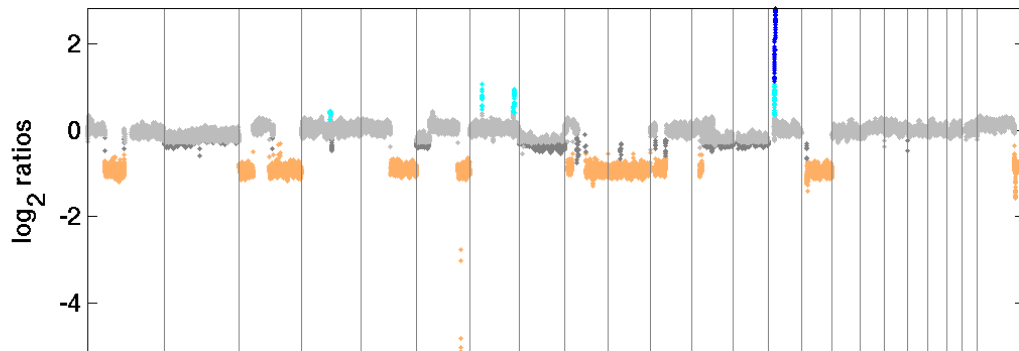

LAU-Me246 - SNP array

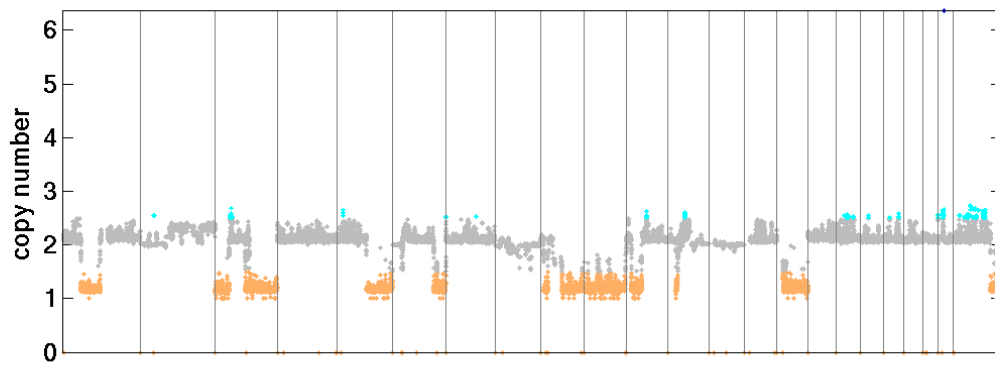

LAU-Me246 - LOH from SNP array

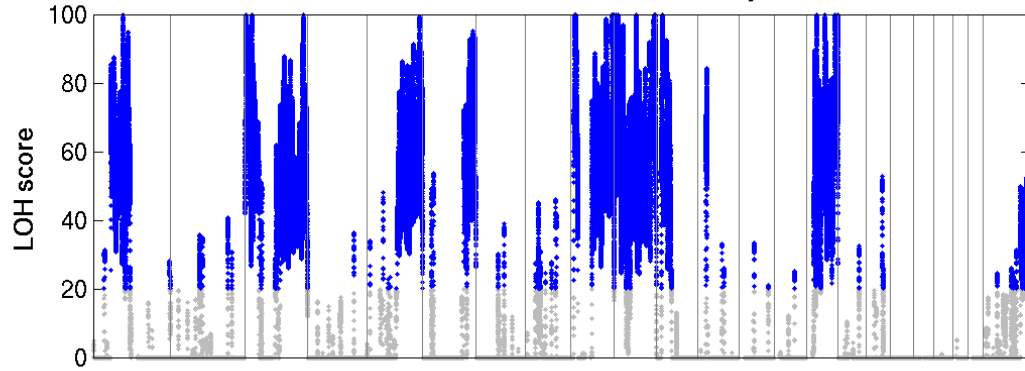

LAU-T618 - CGH array

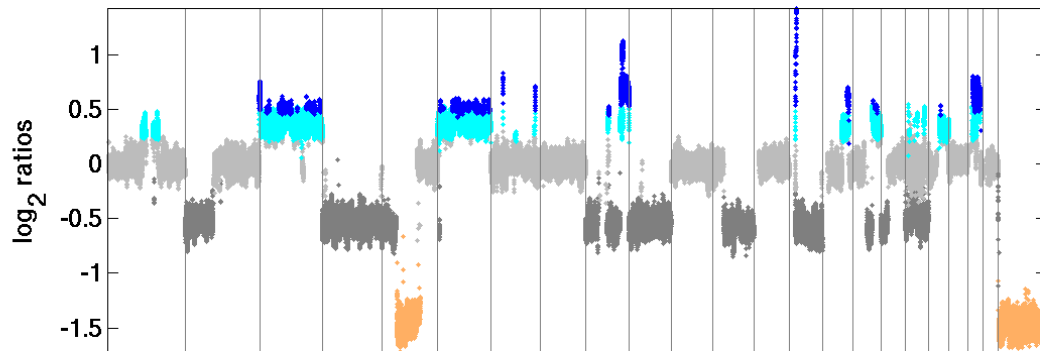

LAU-T618 - SNP array

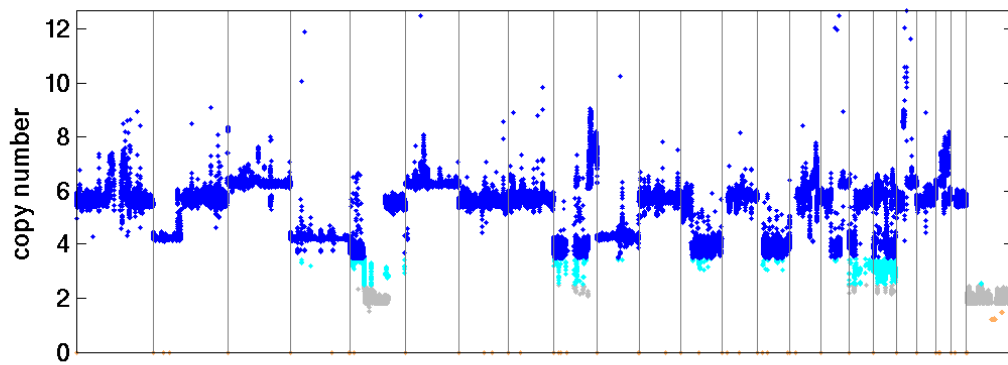

LAU-T618 - LOH from SNP array

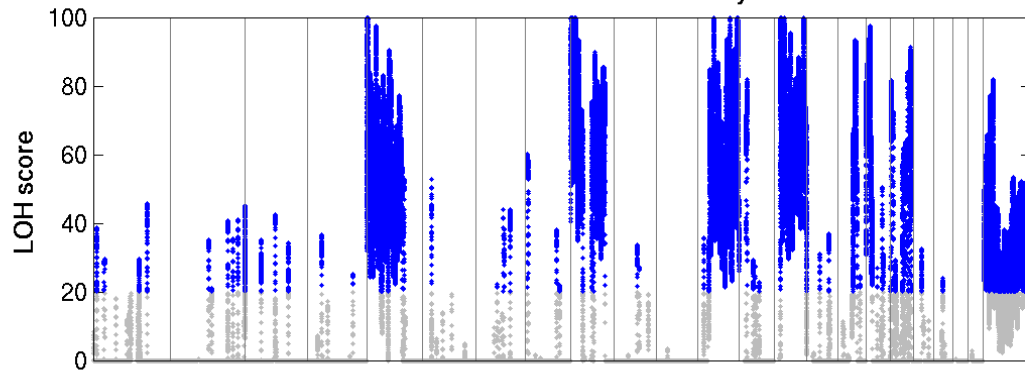

LAU-T50B - CGH array

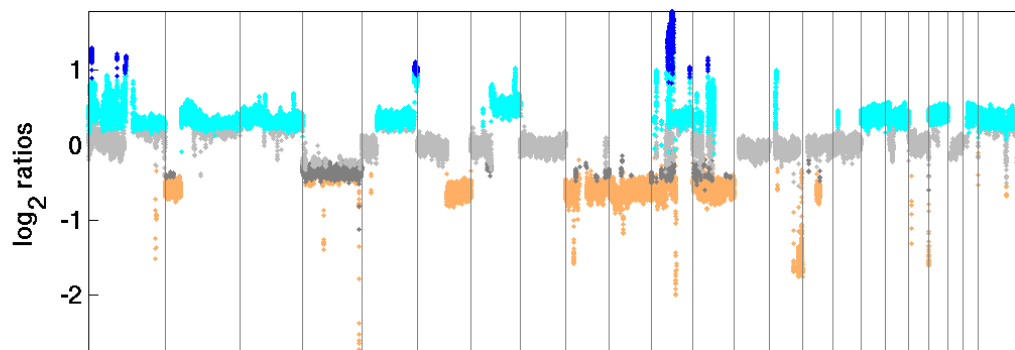

LAU-T50B - SNP array

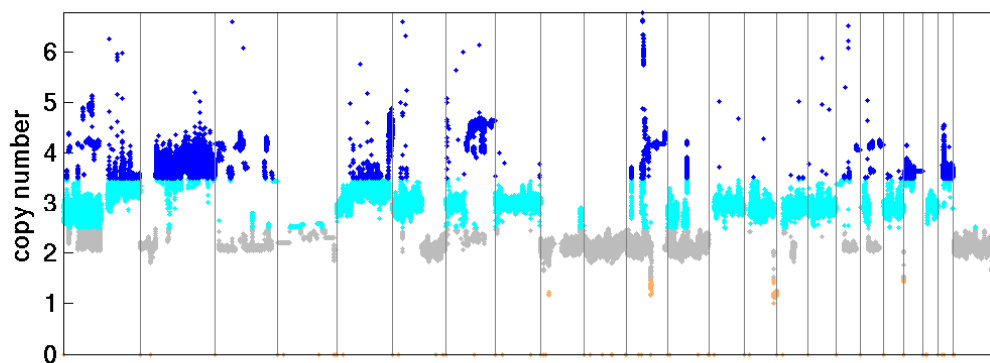

LAU-T50B - LOH from SNP array

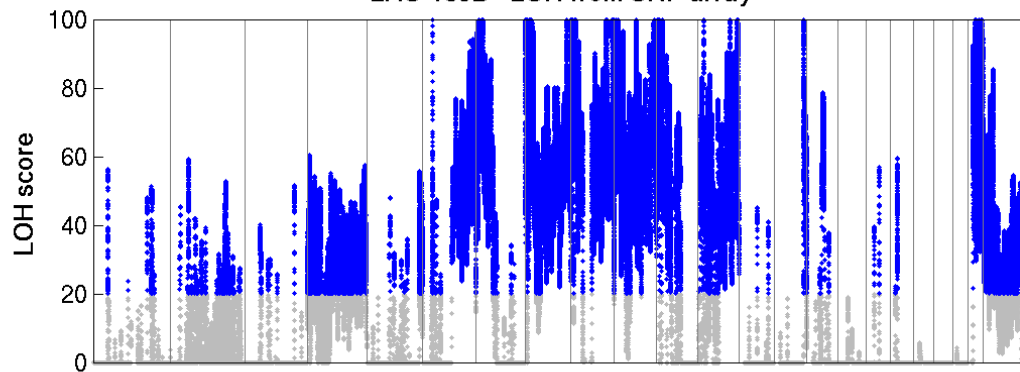

LAU-T149D - CGH array

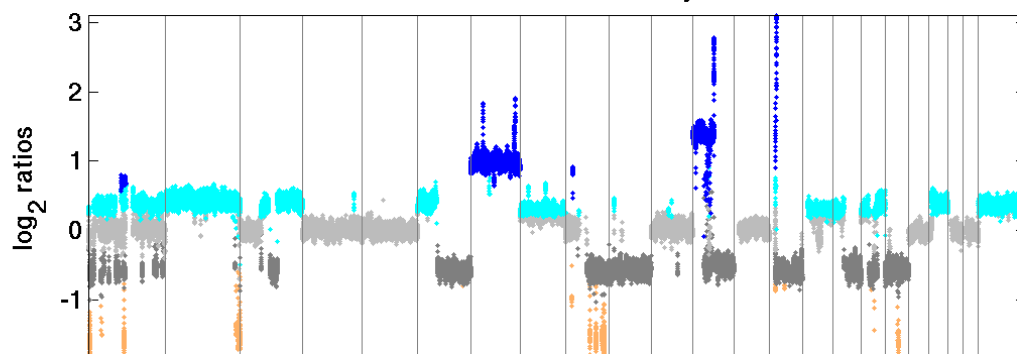

LAU-T149D - SNP array

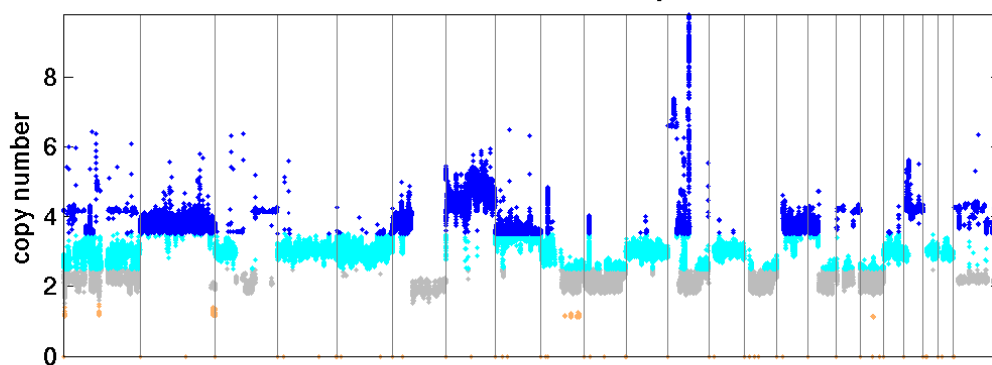

LAU-T149D - LOH from SNP array

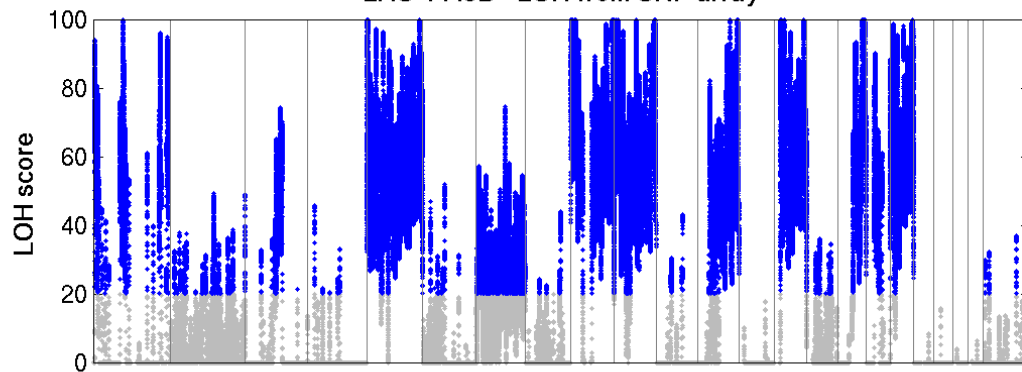

LAU-Me275 - CGH array

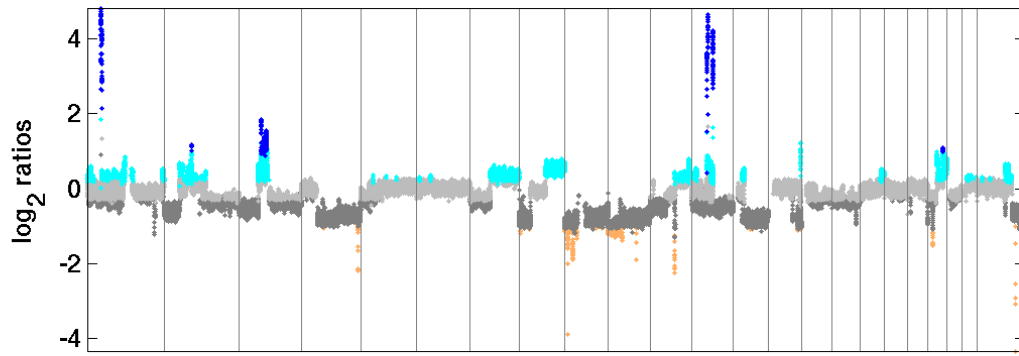

LAU-Me275 - SNP array

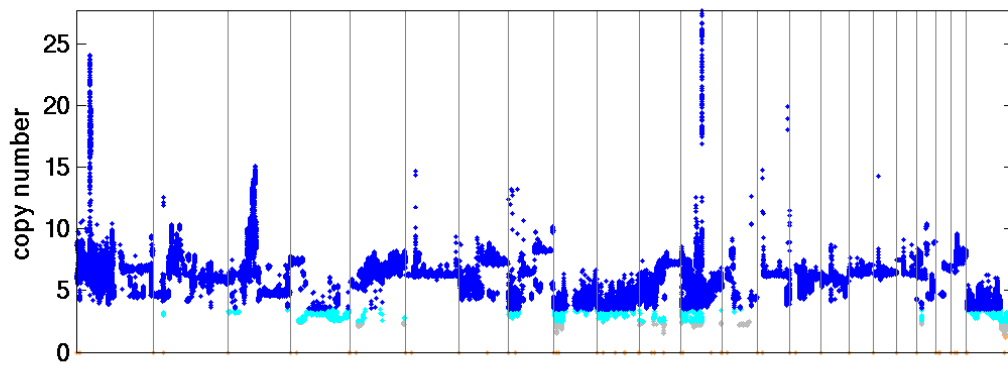

LAU-Me275 - LOH from SNP array

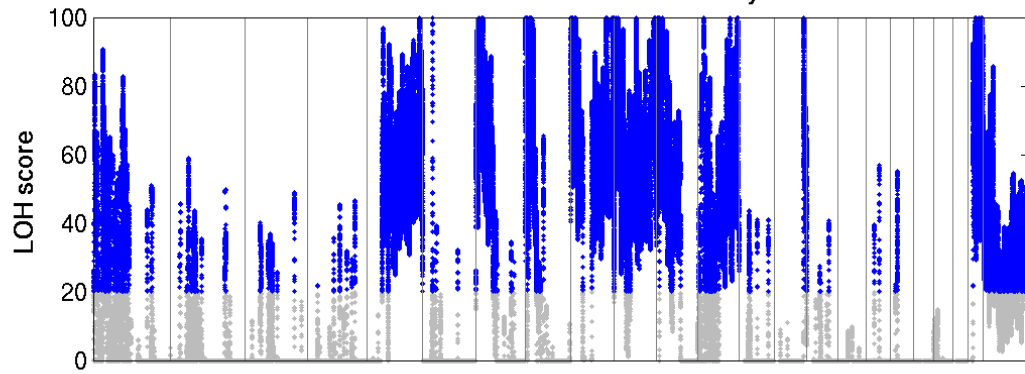

LAU-Me235 - CGH array

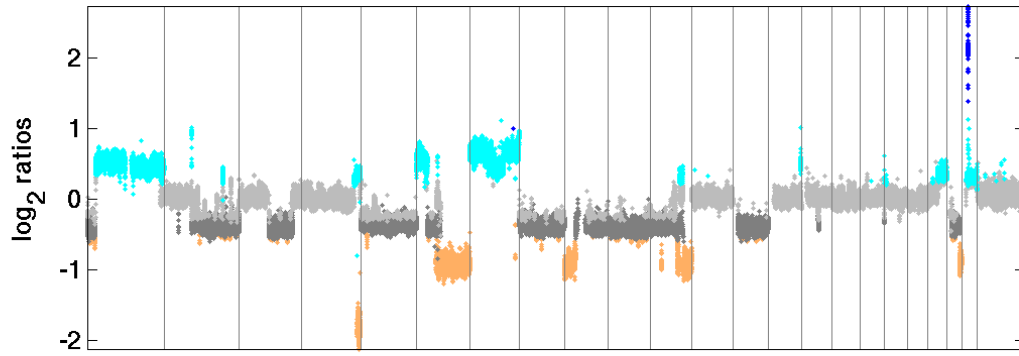

LAU-Me235 - SNP array

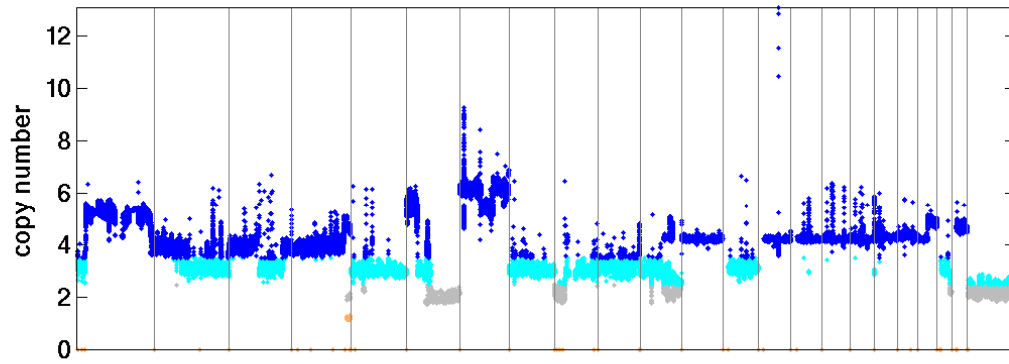

LAU-Me235 - LOH from SNP array

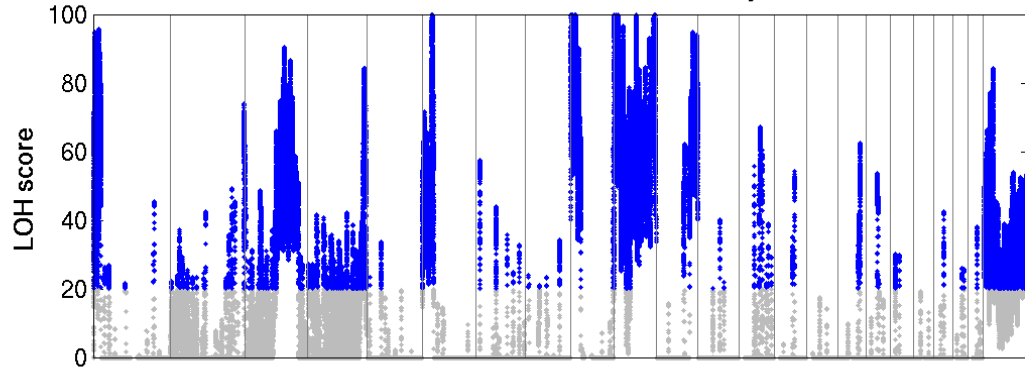

Supplement: pone.0018369.s008.pdf [file pone.0018369.s008.pdf]
