# Supplementary material for: Network-Guided Analysis of Genes with Altered Somatic Copy Number and Gene Expression Reveals Pathways Commonly Perturbed in Metastatic Melanoma
Source: PLoS One. 2011 Apr 8;6(4):e18369. doi: 10.1371/journal.pone.0018369 (PMC3072964; doi:10.1371/journal.pone.0018369)
Supplement: Table S4 — List of pathways significantly enriched in SCNA, and pathway comparison between three melanoma datasets. (XLS) [file pone.0018369.s015.xls]

## Sheet: Final comparison
Pathways	Pathway occurrence in the 3 datasets	Valsesia et al.	Stark and Hayward	Gast et al.
Angiogenesis	3	BRAF, DVL1, EFNB2, EPHA3, EPHB2, FGF1, FRS2, NRAS, PIK3R3, PRKCZ, SFRP1, WNT2B, WNT5B	BRAF, CRKL, DVL3, EPHA3, EPHB3, FGFR3, FRS2, MAPK1, NCK1, NRAS, PIK3C2B, PIK3CA, PLCG2, PRKCI, PTPN11, RAF1, SFRP1, WNT2B, WNT7A	BRAF, NRAS
EGF receptor	3	BRAF, DAB2IP, NRAS, PRKCZ	BRAF, CBL, EGFR, ERBB4, IKBKB, MAPK1, MAPK9, NRAS, PEBP1, PHLDB2, PIK3C2B, PIK3CA, PLCG2, PRKCI, PTPN11, RAF1, RASA4	BRAF, ERBB3, GAB2, NRAS, STAT2, STAT6
ERBB	3	BRAF, CAMK2A, CAMK2G, NRAS, PIK3R3	BRAF, CBL, CRKL, EGFR, ERBB4, HRAS, MAPK1, MAPK9, NCK1, NRAS, PIK3CA, PLCG2, RAF1, SHC1	BRAF, EGFR, ERBB3, NRAS
Integrin (including Insulin IGF signaling)	3	BRAF, NRAS, PIK3R3	ARF1, BCAR1, BRAF, CRKL, FLNC, MAPK1, MAPK9, NRAS, PIK3C2B, PIK3CA, PLCG2, RAC2, RAF1, RAP1A, RAP1B, RAPGEF1, RHOC, SHC1, TLN1	BRAF, NRAS
Long term potentiation	3	BRAF, CAMK2A, CAMK2G, GRIN2B, GRIN2C, NRAS	BRAF, HRAS, MAPK1, NRAS, PPP2R2C, RAF1, RAP1A, RAP1B, RAPGEF3	BRAF, NRAS
MAPK	3	DUSP1, DUSP12, DUSP2, FGF1, FGF14, FGFR4, MAPK9	BRAF, CRKL, DUSP8, EGFR, FGF3, FGF4, FGFR3, HRAS, IKBKB, MAPK1, MAPK9, NR2C2, NRAS, PTPN7, RAF1, RAP1A, RAP1B, SHC1, TGFBR1	BRAF, EGFR, NRAS
Natural killer cell mediated cytotoxicity	3	BRAF, NRAS, PIK3R3	BRAF, HRAS, MAPK1, NRAS, PIK3CA, PLCG2, PTPN11, RAF1, SHC1	BRAF, NRAS
PDGF signaling	3	BRAF, NRAS, PIK3R3	BRAF, JAK2, MAPK1, NCK1, NRAS, PIK3CA, PLCG2, RAF1, RASA4	BRAF, GAB2, NRAS, STAT2, STAT6
Regulation of actin cytoskeleton	3	FGF1, FGF14, FGFR4	BCAR1, BRAF, CRKL, EGFR, FGF3, FGF4, FGFR3, HRAS, MAPK1, NRAS, PIK3CA, RAF1	BRAF, EGFR, NRAS
VEGF	3	BRAF, NRAS, PIK3R3, PRKCZ	FLT4, HRAS, PIK3CA, SHC1	BRAF, NRAS
Alzheimer_disease_amyloid_secretase_pathway	2	CHRM1, CHRM5, PKN3, PRKCZ	CHRM2, CHRM4, MAPK1, MAPK9, PRKCI
Apoptosis/Tumor necrosis factor	2	TANK, TNFRSF1B, TRAF1, TRAF2	IKBKB, IRF7, MAPK1, MAPK9, PIK3CA
Axon guidance	2	CDK5, EFNB2, EPHA3, EPHB2, EPHB6, FES, NRAS	CDK5, EFNA4, EPHA3, EPHB3, HRAS, MAPK1, NCK1, NRAS, NTNG1, NTNG2, PIK3C2B, PIK3CA, PLCG2, RAC2, RHOC
Cadherin signaling	2	ACTG2, CDH19, CDH2, CDH4, FZD8, PCDH17, PCDH9, WNT11, WNT16, WNT2B, WNT4, WNT5B	ACTA2, CDH12, CDH17, CDH18, CDH9, CELSR2, CTNNA3, DVL3, FAT2, FZD8, PCDH15, WNT2B, WNT3A, WNT7A, WNT9A
Calcium signalling	2	CAMK2A, CAMK2G, CHRM1, CHRM5, GNAO1, GRIN2C, PRKCZ, RGS10, RGS11, RGS14, RGS19	CHRM2, CHRM4, GNAI3
Cell cycle	2	CCNA1, CDC20, CDC26, CDKN2B, HDAC1	CREB3, CREB3L1, CREB3L2, CREB3L4
FGF	2	FGF1, FGF14, FGFR4, FRS2	FGF3, FGF4, FGFR3, FRS2, MAPK1, MAPK9, NRAS, PEBP1, PIK3C2B, PIK3CA, PLCG2, PPP2R2C, PRKCI, PTPN11, RAF1, RASA4
G protein signaling	2	ADORA1, ADRA2A, CHRM1, CHRM5, DRD2, GNAO1, GNB3, GNG4, HTR1F, OPRL1, PLCB2, RGS10, RGS11, RGS14, RGS19	ADCY1, ADCY2, ADORA1, ADORA3, CHRM2, CHRM4, CREB3, CREB3L4, DRD3, DRD4, DRD5, GNAI3, GNB2, GNB4, GRM6, GRM7, HRAS, HTR1F, NRAS, PRKAR1B, PRKCI, RAP1A, RAP1B, RGS12, SSTR1, SSTR3, SSTR4, SSTR5
GAP junction	2		ADCY1, ADCY2, EGFR, HRAS, MAPK1, NRAS, RAF1	EGFR, NRAS
GTPase activating biopeptides	2	CAMK2A, CAMK2G, CDK5	CDK5, HRAS, JAK2, MAPK1, RAF1, SHC1
Huntington_disease	2	ACTG2, CLTB, GRIN2B, GRIN2C, GRIN3A, KALRN	AP2A2, CLTA
Inflammation mediated by chemokine and cytokine	2	GNB3, PLCB2	ARPC1A, ARPC1B, ARPC4, FGR, GNB2, GNB4, IKBKB, JAK2, MAPK1, PIK3CA, PLCG2, RAF1
Insulin pathway	2	BRAF, NRAS, PIK3R3, PRKCZ	BRAF, CBL, CRKL, HRAS, IKBKB, MAPK1, MAPK9, NRAS, PIK3CA, PRKCI, PTPN11, RAF1, RAPGEF1, SH2B2, SHC1
JAK STAT	2		CBL, IL2RB, JAK2, PIK3CA, PTPN11	STAT2, STAT6
Melanogenesis	2	CAMK2A, CAMK2G, DVL1, FZD8, NRAS, WNT11, WNT16, WNT2B, WNT4, WNT5B	ADCY1, ADCY2, CREB3, CREB3L1, CREB3L2, CREB3L4, HRAS, MAPK1, NRAS, RAF1
Neurotransmittor	2	GRIN2B, GRIN2C, GRIN3A, KCNQ2, PKN3, PRKCZ	DRD3, DRD4, DRD5, GNAI3, GRIN3A, PRKCI, SHANK2
Notch	2		HEY1, LFNG, MAML1, MFNG, NCOR2, NOTCH2	BRAF, EGFR
Parkinson disease	2	GPR37, HSPA6, UBE2J2	TH, UBE2L3
T and B cell activation	2	BRAF, PIK3R3	BRAF, CBL, HRAS, IKBKB, MAPK1, MAPK9, NCK1, NRAS, PIK3CA, PLCG2, PTPN7, RAF1, SHC1
TGF beta	2	ACVRL1, AMHR2, FOXH1, LEFTY1, SMAD9, TGFB1, TLL2	ACVR2B, MAPK1, MAPK9, NRAS, PPP2R2C, TGFBR1
Ubiquitin proteasome	2	UBA3, UBE2E2	PSMC2, PSMD13, PSMD2, PSMD6, SMURF1, UBE2L3, UBE2T, WWP2
WNT	2	CDH19, CDH2, CDH4, DVL1, FRAT1, FZD8, PCDH17, PCDH9, SFRP1, WNT11, WNT16, WNT2B, WNT4, WNT5B	BCL9, CCND1, DVL3, EN2, FZD8, MMP7, NKD2, PYGO2, SFRP1, SMARCA2, SMARCD3, WNT2B, WNT3A, WNT7A, WNT9A
Adherens junction	1		CTNNA3, EGFR, MAPK1, MLLT4, PVRL1, TGFBR1
Alzheimer disease (presentilin)	1		ACTA2, CTNNA3, MLLT4, PVRL1
Cytoskeletal regulation	1	TUBB1, TUBB2C
FAS signaling	1	CAPG, GSN, SCIN
Fc epsilon RI-mediated signaling	1			GAB2, NRAS
Focal adhesion	1		BCAR1, BRAF, CRKL, EGFR, HRAS, MAPK1, MAPK9, PIK3CA, RAF1, RAP1A, RAP1B, RAPGEF1, SHC1
Glucolysis and Gluconeogenesis	1	BPGM, GAPDH, PGK1
MTOR (translation factor)	1		EIF4A2, EIF4G1
Nerve growth factor	1		BRAF, CRKL, FRS2, MAPK1, MAPK9, PIK3CA, PTPN11, SHC1
Oestrogen receptor (CARM)	1		HDAC4, NCOR2
Purine metabolism	1		ATP5F1, IMPDH1, PAPSS2, POLR1B, POLR2H, POLR2J, POLR2K, POLR2L
Ribosomes	1		RPL32, RPL37, RPLP2, RPS27
Tight juntion	1		HRAS, NRAS, PPP2R2C, PRKCI, RAB13
Transcription factors	1		POLR2H, POLR2J, POLR2K, PRKAB2, PRKAG2, SPIC, TAF13
Valine degradation	1		BCKDHB, PCCB

## Sheet: Stark and Hayward curated
Pathway	Genes	#genes
G protein signaling	ADCY1, ADCY2, ADORA1, ADORA3, CHRM2, CHRM4, CREB3, CREB3L4, DRD3, DRD4, DRD5, GNAI3, GNB2, GNB4, GRM6, GRM7, HRAS, HTR1F, NRAS, PRKAR1B, PRKCI, RAP1A, RAP1B, RGS12, SSTR1, SSTR3, SSTR4, SSTR5	28
Angiogenesis	BRAF, CRKL, DVL3, EPHA3, EPHB3, FGFR3, FRS2, MAPK1, NCK1, NRAS, PIK3C2B, PIK3CA, PLCG2, PRKCI, PTPN11, RAF1, SFRP1, WNT2B, WNT7A	19
INTEGRIN (including Insulin IGF signaling)	ARF1, BCAR1, BRAF, CRKL, FLNC, MAPK1, MAPK9, NRAS, PIK3C2B, PIK3CA, PLCG2, RAC2, RAF1, RAP1A, RAP1B, RAPGEF1, RHOC, SHC1, TLN1	19
MAPK	BRAF, CRKL, DUSP8, EGFR, FGF3, FGF4, FGFR3, HRAS, IKBKB, MAPK1, MAPK9, NR2C2, NRAS, PTPN7, RAF1, RAP1A, RAP1B, SHC1, TGFBR1	19
EGF receptor	BRAF, CBL, EGFR, ERBB4, IKBKB, MAPK1, MAPK9, NRAS, PEBP1, PHLDB2, PIK3C2B, PIK3CA, PLCG2, PRKCI, PTPN11, RAF1, RASA4	17
FGF	FGF3, FGF4, FGFR3, FRS2, MAPK1, MAPK9, NRAS, PEBP1, PIK3C2B, PIK3CA, PLCG2, PPP2R2C, PRKCI, PTPN11, RAF1, RASA4	16
Interleukin	BRAF, CBL, CD2, CD58, CRKL, HRAS, IKBKB, IL2RB, JAK2, MAPK1, NRAS, PIK3CA, PTPN11, RAF1, SHC1, SPIC	16
Axon guidance	CDK5, EFNA4, EPHA3, EPHB3, HRAS, MAPK1, NCK1, NRAS, NTNG1, NTNG2, PIK3C2B, PIK3CA, PLCG2, RAC2, RHOC	15
Cadherin signaling	ACTA2, CDH12, CDH17, CDH18, CDH9, CELSR2, CTNNA3, DVL3, FAT2, FZD8, PCDH15, WNT2B, WNT3A, WNT7A, WNT9A	15
Insulin pathway	BRAF, CBL, CRKL, HRAS, IKBKB, MAPK1, MAPK9, NRAS, PIK3CA, PRKCI, PTPN11, RAF1, RAPGEF1, SH2B2, SHC1	15
WNT	BCL9, CCND1, DVL3, EN2, FZD8, MMP7, NKD2, PYGO2, SFRP1, SMARCA2, SMARCD3, WNT2B, WNT3A, WNT7A, WNT9A	15
ERBB	BRAF, CBL, CRKL, EGFR, ERBB4, HRAS, MAPK1, MAPK9, NCK1, NRAS, PIK3CA, PLCG2, RAF1, SHC1	14
Focal adhesion	BCAR1, BRAF, CRKL, EGFR, HRAS, MAPK1, MAPK9, PIK3CA, RAF1, RAP1A, RAP1B, RAPGEF1, SHC1	13
Regulation of actin cytoskeleton	BCAR1, BRAF, CRKL, EGFR, FGF3, FGF4, FGFR3, HRAS, MAPK1, NRAS, PIK3CA, RAF1	12
T_cell_activation	BRAF, CBL, HRAS, IKBKB, MAPK1, MAPK9, NCK1, NRAS, PIK3CA, PTPN7, RAF1, SHC1	12
Inflammation mediated by chemokine and cytokine	ARPC1A, ARPC1B, ARPC4, FGR, IKBKB, JAK2, MAPK1, PIK3CA, PLCG2, RAF1	10
Melanogenesis	ADCY1, ADCY2, CREB3, CREB3L1, CREB3L2, CREB3L4, HRAS, MAPK1, NRAS, RAF1	10
B cell activation	BRAF, CRKL, FRS2, MAPK1, MAPK9, PIK3CA, PTPN11, SHC1	9
Long term potentiation	BRAF, HRAS, MAPK1, NRAS, PPP2R2C, RAF1, RAP1A, RAP1B, RAPGEF3	9
Natural killer cell mediated cytotoxicity	BRAF, HRAS, MAPK1, NRAS, PIK3CA, PLCG2, PTPN11, RAF1, SHC1	9
PDGF signaling	BRAF, JAK2, MAPK1, NCK1, NRAS, PIK3CA, PLCG2, RAF1, RASA4	9
MET (hepatocyte growth factor receptor c-Met )	CRKL, HRAS, MAPK1, PIK3CA, PTPN11, RAF1, RAP1A, RAP1B	8
Nerve growth factor	BRAF, CRKL, FRS2, MAPK1, MAPK9, PIK3CA, PTPN11, SHC1	8
PI3 Kinase	GNB2, GNB4, JAK2, PIK3CA	8
Purine metabolism	ATP5F1, IMPDH1, PAPSS2, POLR1B, POLR2H, POLR2J, POLR2K, POLR2L	8
Endothelin signaling	ADCY2, MAPK1, PIK3C2B, PIK3CA, PRKAR1B, PRKCI, RAF1	7
GAP junction	ADCY1, ADCY2, EGFR, HRAS, MAPK1, NRAS, RAF1	7
LEUKOCYTE_TRANSENDOTHELIAL_MIGRATION	BCAR1, PIK3CA, PLCG2, PTPN11, RAP1A, RAP1B, RAPGEF3	7
Neurotransmittor	DRD3, DRD4, DRD5, GNAI3, GRIN3A, PRKCI, SHANK2	7
Adherens junction	CTNNA3, EGFR, MAPK1, MLLT4, PVRL1, TGFBR1	6
GTPase activating biopeptides	CDK5, HRAS, JAK2, MAPK1, RAF1, SHC1	6
Notch	HEY1, LFNG, MAML1, MFNG, NCOR2, NOTCH2	6
TGF beta	ACVR2B, MAPK1, MAPK9, NRAS, PPP2R2C, TGFBR1	6
Alzheimer_disease_amyloid_secretase_pathway	CHRM2, CHRM4, MAPK1, MAPK9, PRKCI	5
Apoptosis	IKBKB, IRF7, MAPK1, MAPK9, PIK3CA	5
Cytokine interactions	ACVR2B, EGFR, FLT4, IL2RB, TGFBR1	5
JAK STAT	CBL, IL2RB, JAK2, PIK3CA, PTPN11	5
Phosphatidylinositol signaling	PIK3C2B, PIK3CA, PLCG2, RAF1, TGFBR1	5
Tight juntion	HRAS, NRAS, PPP2R2C, PRKCI, RAB13	5
Adipocytokine	IKBKB, JAK2, MAPK9, PTPN11	4
Alzheimer disease (presentilin)	ACTA2, CTNNA3, MLLT4, PVRL1	4
Interferon gamma signaling	JAK2, MAPK1, MAPK9, PTPN11	4
Proteasome	PSMC2, PSMD13, PSMD2, PSMD6	4
Ribosomes	RPL32, RPL37, RPLP2, RPS27	4
Transcription factors	POLR2H, POLR2J, POLR2K, PRKAB2, PRKAG2, TAF13	4
Transcription regulation by bZIP	CREB3L1, CREB3L2, CREB3L4, PRKAR1B	4
Ubiquitin proteasome	SMURF1, UBE2L3, UBE2T, WWP2	4
VEGF	FLT4, HRAS, PIK3CA, SHC1	4
Calcium signaling	CHRM2, CHRM4, GNAI3	3
Cell cycle (G1 to S transition)	CREB3, CREB3L1, CREB3L4	3
Huntington_disease	AP2A2, CLTA	2
MTOR (translation factor)	EIF4A2, EIF4G1	2
Oestrogen receptor (CARM)	HDAC4, NCOR2	2
Parkinson disease	TH, UBE2L3	2
Valine degradation	BCKDHB, PCCB	2

## Sheet: Stark and Hayward non-curated
Pathway database	Protein network modules ID	Size of protein network module	Pathway	Genes	FDR
MSigDB	cluster0	5	IL17PATHWAY	CD2, CD58	0.006853
Panther	cluster16	7	ubiquitin_proteasome_pathway	SMURF1, UBE2L3, UBE2T, WWP2	0
MSigDB	cluster16	7	HSA05020_PARKINSONS_DISEASE	TH, UBE2L3	0.009589
Panther	cluster16	7	Parkinson_disease	TH, UBE2L3	0.017002
MSigDB	cluster16	7	HSA04120_UBIQUITIN_MEDIATED_PROTEOLYSIS	SMURF1, WWP2	0.025602
MSigDB	cluster19	26	CDC42RACPATHWAY	ARPC1A, ARPC1B, ARPC4	0.000313
MSigDB	cluster19	26	SALMONELLAPATHWAY	ARPC1A, ARPC1B, ARPC4	0.000313
MSigDB	cluster19	26	ACTINYPATHWAY	ARPC1A, ARPC1B, ARPC4	0.000423
MSigDB	cluster19	26	RHOPATHWAY	ARPC1A, ARPC1B, ARPC4	0.001367
MSigDB	cluster19	26	RIBOSOMAL_PROTEINS	RPL32, RPL37, RPLP2, RPS27	0.002062
Panther	cluster19	26	Cytoskeletal_regulation_by_Rho_GTPase	ARPC1A, ARPC1B, ARPC4	0.002959
Panther	cluster19	26	Inflammation_mediated_by_chemokine_and_cytokine_signaling_pathway	ARPC1A, ARPC1B, ARPC4, FGR	0.002959
MSigDB	cluster19	26	HSA03010_RIBOSOME	RPL32, RPL37, RPS27	0.027252
MSigDB	cluster21	5	EIF4PATHWAY	EIF4A2, EIF4G1	0.004478
MSigDB	cluster21	5	MTORPATHWAY	EIF4A2, EIF4G1	0.004478
MSigDB	cluster21	5	TRANSLATION_FACTORS	EIF4A2, EIF4G1	0.013162
MSigDB	cluster22	6	LEPTINPATHWAY	PRKAB2, PRKAG2	0.003451
MSigDB	cluster22	6	CHREBPPATHWAY	PRKAB2, PRKAG2	0.006578
Panther	cluster24	8	Alzheimer_disease_presenilin_pathway	DVL3, FZD8, WNT2B, WNT3A, WNT7A, WNT9A	0
Panther	cluster24	8	Cadherin_signaling_pathway	FZD8, WNT2B, WNT3A, WNT7A, WNT9A	0
MSigDB	cluster24	8	HSA04310_WNT_SIGNALING_PATHWAY	DVL3, FZD8, NKD2, SFRP1, WNT2B, WNT3A, WNT7A, WNT9A	0
MSigDB	cluster24	8	HSA04916_MELANOGENESIS	DVL3, FZD8, WNT2B, WNT3A, WNT7A, WNT9A	0
MSigDB	cluster24	8	HSA05217_BASAL_CELL_CARCINOMA	DVL3, FZD8, WNT2B, WNT3A, WNT7A, WNT9A	0
Panther	cluster24	8	Wnt_signaling_pathway	DVL3, FZD8, NKD2, SFRP1, WNT2B, WNT3A, WNT7A, WNT9A	0
MSigDB	cluster24	8	HSA04340_HEDGEHOG_SIGNALING_PATHWAY	WNT2B, WNT3A, WNT7A, WNT9A	1e-06
MSigDB	cluster24	8	WNT_SIGNALING	DVL3, FZD8, WNT2B, WNT7A	1e-06
Panther	cluster24	8	Angiogenesis	DVL3, SFRP1, WNT2B, WNT7A	4e-06
MSigDB	cluster24	8	ST_WNT_BETA_CATENIN_PATHWAY	NKD2, SFRP1	0.008256
MSigDB	cluster24	8	HSA05210_COLORECTAL_CANCER	DVL3, FZD8	0.043041
Panther	cluster28	7	Notch_signaling_pathway	HEY1, NCOR2	0.005515
MSigDB	cluster28	7	CARM_ERPATHWAY	HDAC4, NCOR2	0.029083
Panther	cluster3	74	Angiogenesis	BRAF, CRKL, EPHA3, EPHB3, FGFR3, FRS2, MAPK1, NCK1, NRAS, PIK3C2B, PIK3CA, PLCG2, PRKCI, PTPN11, RAF1	0
Panther	cluster3	74	B_cell_activation	BRAF, IKBKB, MAPK1, MAPK9, PIK3CA, PLCG2, RAF1	0
MSigDB	cluster3	74	BIOPEPTIDESPATHWAY	CDK5, HRAS, JAK2, MAPK1, RAF1, SHC1	0
MSigDB	cluster3	74	ECMPATHWAY	HRAS, MAPK1, PIK3CA, RAF1, SHC1	0
Panther	cluster3	74	EGF_receptor_signaling_pathway	BRAF, CBL, ERBB4, MAPK1, MAPK9, NRAS, PEBP1, PHLDB2, PIK3C2B, PIK3CA, PLCG2, PRKCI, RAF1, RASA4	0
Panther	cluster3	74	FGF_signaling_pathway	FGF3, FGF4, FGFR3, FRS2, MAPK1, MAPK9, NRAS, PEBP1, PIK3C2B, PIK3CA, PLCG2, PPP2R2C, PRKCI, PTPN11, RAF1, RASA4	0
MSigDB	cluster3	74	GHPATHWAY	HRAS, JAK2, MAPK1, PIK3CA, RAF1, SHC1	0
MSigDB	cluster3	74	GLEEVECPATHWAY	CRKL, HRAS, JAK2, PIK3CA, RAF1	0
MSigDB	cluster3	74	HSA04010_MAPK_SIGNALING_PATHWAY	BRAF, CRKL, DUSP8, EGFR, FGF3, FGF4, FGFR3, HRAS, IKBKB, MAPK1, MAPK9, NRAS, PTPN7, RAF1, RAP1A, RAP1B, TGFBR1	0
MSigDB	cluster3	74	HSA04012_ERBB_SIGNALING_PATHWAY	BRAF, CBL, CRKL, EGFR, ERBB4, HRAS, MAPK1, MAPK9, NCK1, NRAS, PIK3CA, PLCG2, RAF1, SHC1	0
MSigDB	cluster3	74	HSA04360_AXON_GUIDANCE	CDK5, EFNA4, EPHA3, EPHB3, HRAS, MAPK1, NCK1, NRAS, NTNG1	0
MSigDB	cluster3	74	HSA04510_FOCAL_ADHESION	BCAR1, BRAF, CRKL, EGFR, HRAS, MAPK1, MAPK9, PIK3CA, RAF1, RAP1A, RAP1B, RAPGEF1, SHC1	0
MSigDB	cluster3	74	HSA04650_NATURAL_KILLER_CELL_MEDIATED_CYTOTOXICITY	BRAF, HRAS, MAPK1, NRAS, PIK3CA, PLCG2, PTPN11, RAF1, SHC1	0
MSigDB	cluster3	74	HSA04664_FC_EPSILON_RI_SIGNALING_PATHWAY	HRAS, MAPK1, MAPK9, NRAS, PIK3CA, PLCG2, RAF1	0
MSigDB	cluster3	74	HSA04720_LONG_TERM_POTENTIATION	BRAF, HRAS, MAPK1, NRAS, RAF1, RAP1A, RAP1B, RAPGEF3	0
MSigDB	cluster3	74	HSA04810_REGULATION_OF_ACTIN_CYTOSKELETON	BCAR1, BRAF, CRKL, EGFR, FGF3, FGF4, FGFR3, HRAS, MAPK1, NRAS, PIK3CA, RAF1	0
MSigDB	cluster3	74	HSA04910_INSULIN_SIGNALING_PATHWAY	BRAF, CBL, CRKL, HRAS, IKBKB, MAPK1, MAPK9, NRAS, PIK3CA, PRKCI, RAF1, RAPGEF1, SH2B2, SHC1	0
MSigDB	cluster3	74	HSA05211_RENAL_CELL_CARCINOMA	BRAF, CRKL, HRAS, MAPK1, NRAS, PIK3CA, PTPN11, RAF1, RAP1A, RAP1B, RAPGEF1	0
MSigDB	cluster3	74	HSA05212_PANCREATIC_CANCER	BRAF, EGFR, IKBKB, MAPK1, MAPK9, PIK3CA, RAF1, TGFBR1	0
MSigDB	cluster3	74	HSA05213_ENDOMETRIAL_CANCER	BRAF, EGFR, HRAS, MAPK1, NRAS, PIK3CA, RAF1	0
MSigDB	cluster3	74	HSA05214_GLIOMA	BRAF, EGFR, HRAS, MAPK1, NRAS, PIK3CA, PLCG2, RAF1, SHC1	0
MSigDB	cluster3	74	HSA05215_PROSTATE_CANCER	BRAF, EGFR, HRAS, IKBKB, MAPK1, NRAS, PIK3CA, RAF1	0
MSigDB	cluster3	74	HSA05218_MELANOMA	BRAF, EGFR, FGF3, FGF4, HRAS, MAPK1, NRAS, PIK3CA, RAF1	0
MSigDB	cluster3	74	HSA05219_BLADDER_CANCER	BRAF, EGFR, FGFR3, HRAS, MAPK1, NRAS, RAF1	0
MSigDB	cluster3	74	HSA05220_CHRONIC_MYELOID_LEUKEMIA	BRAF, CBL, CRKL, HRAS, IKBKB, MAPK1, NRAS, PIK3CA, PTPN11, RAF1, SHC1, TGFBR1	0
MSigDB	cluster3	74	HSA05221_ACUTE_MYELOID_LEUKEMIA	BRAF, HRAS, IKBKB, MAPK1, NRAS, PIK3CA, RAF1	0
MSigDB	cluster3	74	HSA05223_NON_SMALL_CELL_LUNG_CANCER	BRAF, EGFR, HRAS, MAPK1, NRAS, PIK3CA, PLCG2, RAF1	0
MSigDB	cluster3	74	IGF1PATHWAY	HRAS, PIK3CA, PTPN11, RAF1, SHC1	0
MSigDB	cluster3	74	IGF1RPATHWAY	HRAS, MAPK1, PIK3CA, RAF1, SHC1	0
MSigDB	cluster3	74	IL2RBPATHWAY	CBL, CRKL, HRAS, IL2RB, MAPK1, PIK3CA, RAF1, SHC1	0
MSigDB	cluster3	74	IL6PATHWAY	HRAS, JAK2, PTPN11, RAF1, SHC1	0
MSigDB	cluster3	74	INSULINPATHWAY	HRAS, PIK3CA, PTPN11, RAF1, SHC1	0
Panther	cluster3	74	Integrin_signalling_pathway	BCAR1, BRAF, CRKL, MAPK1, MAPK9, NRAS, PIK3C2B, PIK3CA, RAF1, RAP1A, RAP1B, RAPGEF1	0
MSigDB	cluster3	74	INTEGRINPATHWAY	BCAR1, CRKL, HRAS, MAPK1, RAF1, RAP1A, SHC1	0
Panther	cluster3	74	Interleukin_signaling_pathway	BRAF, IKBKB, IL2RB, MAPK1, NRAS, PIK3CA, RAF1, SPIC	0
MSigDB	cluster3	74	MAPKPATHWAY	BRAF, HRAS, IKBKB, MAPK1, MAPK9, RAF1, SHC1, TGFBR1	0
MSigDB	cluster3	74	METPATHWAY	CRKL, HRAS, MAPK1, PIK3CA, PTPN11, RAF1, RAP1A, RAP1B	0
Panther	cluster3	74	PDGF_signaling_pathway	BRAF, JAK2, MAPK1, NCK1, NRAS, PIK3CA, PLCG2, RAF1, RASA4	0
MSigDB	cluster3	74	PYK2PATHWAY	BCAR1, CRKL, HRAS, MAPK1, RAF1, SHC1	0
MSigDB	cluster3	74	SPRYPATHWAY	CBL, EGFR, HRAS, MAPK1, RAF1, SHC1	0
MSigDB	cluster3	74	ST_DIFFERENTIATION_PATHWAY_IN_PC12_CELLS	BRAF, CRKL, FRS2, MAPK1, MAPK9, PIK3CA, PTPN11, SHC1	0
MSigDB	cluster3	74	ST_INTEGRIN_SIGNALING_PATHWAY	BCAR1, BRAF, MAPK1, MAPK9, PIK3CA, PLCG2, RAF1, SHC1	0
Panther	cluster3	74	T_cell_activation	BRAF, IKBKB, MAPK1, MAPK9, NCK1, PIK3CA, RAF1	0
MSigDB	cluster3	74	TPOPATHWAY	HRAS, JAK2, PIK3CA, RAF1, SHC1	0
Panther	cluster3	74	VEGF_signaling_pathway	BRAF, MAPK1, NRAS, PIK3C2B, PIK3CA, PLCG2, PRKCI, RAF1	0
MSigDB	cluster3	74	CXCR4PATHWAY	BCAR1, HRAS, MAPK1, PIK3CA, RAF1	1e-06
MSigDB	cluster3	74	EGFPATHWAY	EGFR, HRAS, PIK3CA, RAF1, SHC1	1e-06
MSigDB	cluster3	74	HSA04320_DORSO_VENTRAL_AXIS_FORMATION	BRAF, EGFR, ERBB4, MAPK1, RAF1	1e-06
MSigDB	cluster3	74	HSA05210_COLORECTAL_CANCER	BRAF, EGFR, MAPK1, MAPK9, PIK3CA, RAF1, TGFBR1	1e-06
Panther	cluster3	74	Ras_Pathway	BRAF, MAPK1, MAPK9, NRAS, PIK3CA, RAF1	1e-06
MSigDB	cluster3	74	ERKPATHWAY	EGFR, HRAS, MAPK1, RAF1, SHC1	2e-06
MSigDB	cluster3	74	AT1RPATHWAY	EGFR, HRAS, MAPK1, RAF1, SHC1	3e-06
MSigDB	cluster3	74	CDK5PATHWAY	CDK5, HRAS, MAPK1, RAF1	3e-06
MSigDB	cluster3	74	FCER1PATHWAY	HRAS, MAPK1, PIK3CA, RAF1, SHC1	4e-06
MSigDB	cluster3	74	HSA04370_VEGF_SIGNALING_PATHWAY	HRAS, MAPK1, NRAS, PIK3CA, PLCG2, RAF1	4e-06
MSigDB	cluster3	74	HSA04670_LEUKOCYTE_TRANSENDOTHELIAL_MIGRATION	BCAR1, PIK3CA, PLCG2, PTPN11, RAP1A, RAP1B, RAPGEF3	4e-06
MSigDB	cluster3	74	IL3PATHWAY	HRAS, JAK2, RAF1, SHC1	4e-06
MSigDB	cluster3	74	ST_ADRENERGIC	BRAF, EGFR, MAPK1, PIK3CA, RAF1	4e-06
MSigDB	cluster3	74	ST_G_ALPHA_I_PATHWAY	BRAF, EGFR, MAPK1, RAF1, SHC1	4e-06
MSigDB	cluster3	74	HSA04730_LONG_TERM_DEPRESSION	BRAF, HRAS, MAPK1, NRAS, PPP2R2C, RAF1	5e-06
MSigDB	cluster3	74	ST_B_CELL_ANTIGEN_RECEPTOR	MAPK1, PIK3CA, PLCG2, RAF1, SHC1	5e-06
MSigDB	cluster3	74	ERK5PATHWAY	HRAS, MAPK1, PIK3CA, SHC1	6e-06
MSigDB	cluster3	74	PTENPATHWAY	BCAR1, MAPK1, PIK3CA, SHC1	8e-06
MSigDB	cluster3	74	EPOPATHWAY	HRAS, JAK2, RAF1, SHC1	9e-06
MSigDB	cluster3	74	KERATINOCYTEPATHWAY	EGFR, HRAS, IKBKB, MAPK1, RAF1	9e-06
MSigDB	cluster3	74	NGFPATHWAY	HRAS, PIK3CA, RAF1, SHC1	9e-06
MSigDB	cluster3	74	SIG_BCR_SIGNALING_PATHWAY	MAPK1, PIK3CA, PLCG2, RAF1, SHC1	9e-06
MSigDB	cluster3	74	TCRPATHWAY	HRAS, PIK3CA, PTPN7, RAF1, SHC1	9e-06
MSigDB	cluster3	74	HSA04660_T_CELL_RECEPTOR_SIGNALING_PATHWAY	CBL, HRAS, IKBKB, NCK1, NRAS, PIK3CA	1.5e-05
MSigDB	cluster3	74	SIG_INSULIN_RECEPTOR_PATHWAY_IN_CARDIAC_MYOCYTES	CBL, MAPK1, PIK3CA, RAF1, SHC1	1.5e-05
MSigDB	cluster3	74	IL2PATHWAY	HRAS, IL2RB, RAF1, SHC1	1.6e-05
MSigDB	cluster3	74	HSA04912_GNRH_SIGNALING_PATHWAY	EGFR, HRAS, MAPK1, MAPK9, NRAS, RAF1	1.8e-05
MSigDB	cluster3	74	RACCYCDPATHWAY	HRAS, MAPK1, PIK3CA, RAF1	1.8e-05
MSigDB	cluster3	74	PDGFPATHWAY	HRAS, PIK3CA, RAF1, SHC1	3.3e-05
MSigDB	cluster3	74	SIG_IL4RECEPTOR_IN_B_LYPHOCYTES	MAPK1, PIK3CA, RAF1, SHC1	3.3e-05
MSigDB	cluster3	74	VEGFPATHWAY	FLT4, HRAS, PIK3CA, SHC1	3.8e-05
MSigDB	cluster3	74	HSA04662_B_CELL_RECEPTOR_SIGNALING_PATHWAY	HRAS, IKBKB, NRAS, PIK3CA, PLCG2	4.2e-05
Panther	cluster3	74	Endothelin_signaling_pathway	MAPK1, PIK3C2B, PIK3CA, PRKCI, RAF1	4.3e-05
MSigDB	cluster3	74	HSA05216_THYROID_CANCER	BRAF, HRAS, MAPK1, NRAS	4.3e-05
Panther	cluster3	74	Axon_guidance_mediated_by_netrin	NTNG2, PIK3C2B, PIK3CA, PLCG2	4.5e-05
Panther	cluster3	74	Interferon_gamma_signaling_pathway	JAK2, MAPK1, MAPK9, PTPN11	4.5e-05
MSigDB	cluster3	74	HSA05120_EPITHELIAL_CELL_SIGNALING_IN_HELICOBACTER_PYLORI_INFECTION	EGFR, IKBKB, MAPK9, PLCG2, PTPN11	5.4e-05
MSigDB	cluster3	74	ST_ERK1_ERK2_MAPK_PATHWAY	BRAF, MAPK1, RAP1A, SHC1	6.1e-05
Panther	cluster3	74	PI_3-Kinase	GNB2, GNB4, JAK2, PIK3CA	0.000141
MSigDB	cluster3	74	ST_JNK_MAPK_PATHWAY	DUSP8, MAPK9, NR2C2, SHC1	0.000146
Panther	cluster3	74	TGF_beta_signaling_pathway	ACVR2B, MAPK1, MAPK9, NRAS, TGFBR1	0.000182
MSigDB	cluster3	74	LONGEVITYPATHWAY	HRAS, PIK3CA, SHC1	0.000189
MSigDB	cluster3	74	PHOSPHATIDYLINOSITOL_SIGNALING_SYSTEM	PIK3C2B, PIK3CA, PLCG2, RAF1, TGFBR1	0.000189
MSigDB	cluster3	74	TRKAPATHWAY	HRAS, PIK3CA, SHC1	0.000189
Panther	cluster3	74	Inflammation_mediated_by_chemokine_and_cytokine_signaling_pathway	IKBKB, JAK2, MAPK1, PIK3CA, PLCG2, RAF1	0.000191
MSigDB	cluster3	74	HSA04930_TYPE_II_DIABETES_MELLITUS	IKBKB, MAPK1, MAPK9, PIK3CA	0.000201
MSigDB	cluster3	74	ST_T_CELL_SIGNAL_TRANSDUCTION	CBL, MAPK1, NCK1, RAF1	0.000217
Panther	cluster3	74	Heterotrimeric_G_protein_signaling_pathway_Gq_and_Go_mediated_pathway	GNB2, GNB4, PRKCI, RAP1A, RAP1B	0.000246
MSigDB	cluster3	74	CDMACPATHWAY	HRAS, MAPK1, RAF1	0.000267
MSigDB	cluster3	74	ST_G_ALPHA_S_PATHWAY	BRAF, MAPK1, RAF1	0.000267
MSigDB	cluster3	74	HSA04540_GAP_JUNCTION	EGFR, HRAS, MAPK1, NRAS, RAF1	0.000277
MSigDB	cluster3	74	SA_PTEN_PATHWAY	MAPK1, PIK3CA, SHC1	0.000307
MSigDB	cluster3	74	SA_TRKA_RECEPTOR	HRAS, PIK3CA, SHC1	0.000307
MSigDB	cluster3	74	HSA04620_TOLL_LIKE_RECEPTOR_SIGNALING_PATHWAY	IKBKB, IRF7, MAPK1, MAPK9, PIK3CA	0.000323
MSigDB	cluster3	74	NFATPATHWAY	HRAS, MAPK1, PIK3CA, RAF1	0.000376
MSigDB	cluster3	74	SPPAPATHWAY	HRAS, MAPK1, RAF1	0.000635
MSigDB	cluster3	74	CCR3PATHWAY	HRAS, MAPK1, RAF1	0.000707
MSigDB	cluster3	74	RASPATHWAY	HRAS, PIK3CA, RAF1	0.000707
MSigDB	cluster3	74	SA_B_CELL_RECEPTOR_COMPLEXES	HRAS, MAPK1, SHC1	0.000792
MSigDB	cluster3	74	INOSITOL_PHOSPHATE_METABOLISM	PIK3C2B, PIK3CA, PLCG2	0.000873
MSigDB	cluster3	74	MCALPAINPATHWAY	EGFR, HRAS, MAPK1	0.000873
MSigDB	cluster3	74	ST_INTERLEUKIN_4_PATHWAY	JAK2, PIK3CA, SHC1	0.000968
MSigDB	cluster3	74	CREBPATHWAY	HRAS, MAPK1, PIK3CA	0.00107
MSigDB	cluster3	74	HSA04530_TIGHT_JUNCTION	HRAS, NRAS, PPP2R2C, PRKCI, RAB13	0.001101
MSigDB	cluster3	74	HSA04920_ADIPOCYTOKINE_SIGNALING_PATHWAY	IKBKB, JAK2, MAPK9, PTPN11	0.001101
MSigDB	cluster3	74	HSA04630_JAK_STAT_SIGNALING_PATHWAY	CBL, IL2RB, JAK2, PIK3CA, PTPN11	0.001877
MSigDB	cluster3	74	SIG_CD40PATHWAYMAP	MAPK1, MAPK9, PIK3CA	0.002009
MSigDB	cluster3	74	BCRPATHWAY	HRAS, RAF1, SHC1	0.002163
Panther	cluster3	74	Apoptosis_signaling_pathway	IKBKB, MAPK1, MAPK9, PIK3CA	0.002168
MSigDB	cluster3	74	HSA04350_TGF_BETA_SIGNALING_PATHWAY	ACVR2B, MAPK1, PPP2R2C, TGFBR1	0.002453
MSigDB	cluster3	74	FMLPPATHWAY	HRAS, MAPK1, RAF1	0.00249
Panther	cluster3	74	p53_pathway_feedback_loops_2	NRAS, PIK3C2B, PIK3CA	0.002548
MSigDB	cluster3	74	INTEGRIN_MEDIATED_CELL_ADHESION_KEGG	BCAR1, RAP1B, RAPGEF1, SHC1	0.002946
MSigDB	cluster3	74	G_PROTEIN_SIGNALING	GNB2, HRAS, NRAS, PRKCI	0.003009
MSigDB	cluster3	74	HBXPATHWAY	HRAS, SHC1	0.003009
MSigDB	cluster3	74	P38MAPKPATHWAY	HRAS, SHC1, TGFBR1	0.003009
MSigDB	cluster3	74	STAT3PATHWAY	JAK2, MAPK1	0.003009
Panther	cluster3	74	Toll_receptor_signaling_pathway	IKBKB, MAPK1, MAPK9	0.003567
MSigDB	cluster3	74	HSA04916_MELANOGENESIS	HRAS, MAPK1, NRAS, RAF1	0.00366
MSigDB	cluster3	74	HSA04150_MTOR_SIGNALING_PATHWAY	BRAF, MAPK1, PIK3CA	0.004929
MSigDB	cluster3	74	CBLPATHWAY	CBL, EGFR	0.007301
Panther	cluster3	74	Alzheimer_disease_amyloid_secretase_pathway	MAPK1, MAPK9, PRKCI	0.008486
MSigDB	cluster3	74	HCMVPATHWAY	MAPK1, PIK3CA	0.010732
MSigDB	cluster3	74	ST_FAS_SIGNALING_PATHWAY	EGFR, MAPK1, MAPK9	0.011875
MSigDB	cluster3	74	SIG_PIP3_SIGNALING_IN_CARDIAC_MYOCTES	ERBB4, PIK3CA, SHC1	0.012277
MSigDB	cluster3	74	CARDIACEGFPATHWAY	EGFR, HRAS	0.013063
Panther	cluster3	74	Histamine_H1_receptor_mediated_signaling_pathway	PLCG2, PRKCI	0.013659
MSigDB	cluster3	74	TIDPATHWAY	IKBKB, JAK2	0.014349
MSigDB	cluster3	74	HSA04060_CYTOKINE_CYTOKINE_RECEPTOR_INTERACTION	ACVR2B, EGFR, FLT4, IL2RB, TGFBR1	0.015826
MSigDB	cluster3	74	HSA04520_ADHERENS_JUNCTION	EGFR, MAPK1, TGFBR1	0.016261
MSigDB	cluster3	74	CTLA4PATHWAY	PIK3CA, PTPN11	0.016904
Panther	cluster3	74	Angiotensin_II-stimulated_signaling_through_G_proteins_and_beta-arrestin	MAPK1, RAF1	0.017804
MSigDB	cluster3	74	HSA04070_PHOSPHATIDYLINOSITOL_SIGNALING_SYSTEM	PIK3C2B, PIK3CA, PLCG2	0.017831
MSigDB	cluster3	74	CERAMIDEPATHWAY	MAPK1, RAF1	0.017996
MSigDB	cluster3	74	RAC1PATHWAY	CDK5, PIK3CA	0.017996
MSigDB	cluster3	74	MPRPATHWAY	HRAS, MAPK1	0.019255
MSigDB	cluster3	74	ST_GA12_PATHWAY	MAPK1, RAF1	0.019255
MSigDB	cluster3	74	EIF4PATHWAY	MAPK1, PIK3CA	0.020534
MSigDB	cluster3	74	NTHIPATHWAY	IKBKB, TGFBR1	0.020534
MSigDB	cluster3	74	EDG1PATHWAY	MAPK1, PIK3CA	0.023714
MSigDB	cluster3	74	ST_GRANULE_CELL_SURVIVAL_PATHWAY	MAPK1, MAPK9	0.027076
Panther	cluster3	74	Hypoxia_response_via_HIF_activation	PIK3C2B, PIK3CA	0.028108
Panther	cluster3	74	Insulin_IGF_pathway_MAP_kinase_cascade	MAPK1, RAF1	0.034885
Panther	cluster3	74	Muscarinic_acetylcholine_receptor_1_and_3_signaling_pathway	GRIN3A, PRKCI	0.034885
Panther	cluster3	74	Oxytocin_receptor_mediated_signaling_pathway	PLCG2, PRKCI	0.034885
Panther	cluster3	74	Thyrotropin-releasing_hormone_receptor_signaling_pathway	PLCG2, PRKCI	0.035723
MSigDB	cluster3	74	ST_DICTYOSTELIUM_DISCOIDEUM_CAMP_CHEMOTAXIS_PATHWAY	MAPK1, PIK3CA	0.036668
Panther	cluster3	74	5HT2_type_receptor_mediated_signaling_pathway	PLCG2, PRKCI	0.037392
Panther	cluster3	74	Insulin_IGF_pathway-protein_kinase_B_signaling_cascade	PIK3C2B, PIK3CA	0.037392
Panther	cluster3	74	Ionotropic_glutamate_receptor_pathway	GRIN3A, SHANK2	0.04031
MSigDB	cluster3	74	GPCRPATHWAY	HRAS, RAF1	0.040653
MSigDB	cluster3	74	SIG_PIP3_SIGNALING_IN_B_LYMPHOCYTES	PIK3CA, PLCG2	0.042533
MSigDB	cluster3	74	ST_P38_MAPK_PATHWAY	MAPK1, NR2C2	0.044435
MSigDB	cluster3	74	ST_PHOSPHOINOSITIDE_3_KINASE_PATHWAY	PIK3CA, SHC1	0.04636
MSigDB	cluster30	6	HSA00280_VALINE_LEUCINE_AND_ISOLEUCINE_DEGRADATION	BCKDHB, PCCB	0.022094
MSigDB	cluster30	6	VALINE_LEUCINE_AND_ISOLEUCINE_DEGRADATION	BCKDHB, PCCB	0.022094
MSigDB	cluster34	17	GPCRDB_CLASS_A_RHODOPSIN_LIKE	ADORA1, ADORA3, CHRM2, CHRM4, DRD3, DRD4, DRD5, HTR1F, SSTR1, SSTR3, SSTR4	0
Panther	cluster34	17	Heterotrimeric_G_protein_signaling_pathway_Gi_and_Gs_mediated_pathway	ADORA1, ADORA3, CHRM2, CHRM4, DRD3, DRD4, DRD5, GNAI3, GRM6, GRM7, HTR1F, RGS12, SSTR1, SSTR3, SSTR4, SSTR5	0
Panther	cluster34	17	Heterotrimeric_G_protein_signaling_pathway_Gq_and_Go_mediated_pathway	ADORA1, ADORA3, CHRM2, CHRM4, DRD3, DRD4, DRD5, GRM6, GRM7, RGS12, SSTR1, SSTR3, SSTR4, SSTR5	0
MSigDB	cluster34	17	HSA04080_NEUROACTIVE_LIGAND_RECEPTOR_INTERACTION	ADORA1, ADORA3, CHRM2, CHRM4, DRD3, DRD4, DRD5, GRM6, GRM7, HTR1F, SSTR1, SSTR3, SSTR4, SSTR5	0
MSigDB	cluster34	17	MONOAMINE_GPCRS	CHRM2, CHRM4, DRD3, DRD4, DRD5, HTR1F	0
Panther	cluster34	17	Dopamine_receptor_mediated_signaling_pathway	DRD3, DRD4, DRD5, GNAI3	2e-06
MSigDB	cluster34	17	GPCRDB_OTHER	ADORA3, CHRM2, DRD4	0.003205
MSigDB	cluster34	17	NUCLEOTIDE_GPCRS	ADORA1, ADORA3	0.003205
MSigDB	cluster34	17	PEPTIDE_GPCRS	SSTR1, SSTR3, SSTR4	0.003205
MSigDB	cluster34	17	CALCIUM_REGULATION_IN_CARDIAC_CELLS	CHRM2, CHRM4, GNAI3	0.018753
Panther	cluster34	17	Alzheimer_disease_amyloid_secretase_pathway	CHRM2, CHRM4	0.035591
Panther	cluster38	9	Wnt_signaling_pathway	BCL9, CCND1, EN2, MMP7, PYGO2, SMARCA2, SMARCD3	0
MSigDB	cluster4	15	RNA_POLYMERASE	POLR2H, POLR2J, POLR2K, POLR2L	0
MSigDB	cluster4	15	HSA03020_RNA_POLYMERASE	POLR2H, POLR2J, POLR2K, POLR2L	1e-06
MSigDB	cluster4	15	RNA_TRANSCRIPTION_REACTOME	POLR2H, POLR2J, POLR2K, TAF13	3e-06
MSigDB	cluster4	15	PYRIMIDINE_METABOLISM	POLR2H, POLR2J, POLR2K, POLR2L	1.5e-05
MSigDB	cluster4	15	HSA00240_PYRIMIDINE_METABOLISM	POLR2H, POLR2J, POLR2K, POLR2L	5.7e-05
MSigDB	cluster4	15	PURINE_METABOLISM	POLR2H, POLR2J, POLR2K, POLR2L	0.000135
MSigDB	cluster4	15	HSA00230_PURINE_METABOLISM	POLR2H, POLR2J, POLR2K, POLR2L	0.00028
Panther	cluster49	7	Integrin_signalling_pathway	FLNC, TLN1	0.045722
MSigDB	cluster5	37	HSA03050_PROTEASOME	PSMC2, PSMD13, PSMD2, PSMD6	6.6e-05
MSigDB	cluster5	37	PURINE_METABOLISM	ATP5F1, IMPDH1, PAPSS2, POLR1B	0.024336
Panther	cluster5	37	Axon_guidance_mediated_by_Slit_Robo	RAC2, RHOC	0.040825
Panther	cluster5	37	Integrin_signalling_pathway	ARF1, RAC2, RHOC	0.040825
Panther	cluster58	12	Cadherin_signaling_pathway	ACTA2, CDH12, CDH17, CDH18, CDH9, CELSR2, CTNNA3, FAT2, PCDH15	0
Panther	cluster58	12	Wnt_signaling_pathway	ACTA2, CDH12, CDH17, CDH18, CDH9, CELSR2, CTNNA3, FAT2, PCDH15	0
Panther	cluster58	12	Alzheimer_disease_presenilin_pathway	ACTA2, CTNNA3, MLLT4, PVRL1	1.3e-05
MSigDB	cluster58	12	HSA04520_ADHERENS_JUNCTION	CTNNA3, MLLT4, PVRL1	0.00656
Panther	cluster64	6	Huntington_disease	AP2A2, CLTA	0.019638
MSigDB	cluster65	5	HSA04330_NOTCH_SIGNALING_PATHWAY	LFNG, MAML1, MFNG, NOTCH2	0
Panther	cluster65	5	Notch_signaling_pathway	LFNG, MFNG, NOTCH2	7e-06
MSigDB	cluster7	7	HSA04916_MELANOGENESIS	ADCY1, ADCY2, CREB3, CREB3L1, CREB3L2, CREB3L4	0
Panther	cluster7	7	Transcription_regulation_by_bZIP	CREB3L1, CREB3L2, CREB3L4, PRKAR1B	0
Panther	cluster7	7	GABA-B_receptor_II_pathway	ADCY1, ADCY2, PRKAR1B	2e-06
MSigDB	cluster7	7	HSA05215_PROSTATE_CANCER	CREB3, CREB3L1, CREB3L2, CREB3L4	7e-06
MSigDB	cluster7	7	SMOOTH_MUSCLE_CONTRACTION	ADCY1, ADCY2, CREB3, PRKAR1B	3.9e-05
MSigDB	cluster7	7	G1_TO_S_CELL_CYCLE_REACTOME	CREB3, CREB3L1, CREB3L4	0.000329
Panther	cluster7	7	Heterotrimeric_G_protein_signaling_pathway_Gi_and_Gs_mediated_pathway	ADCY2, CREB3L4, PRKAR1B	0.00052
MSigDB	cluster7	7	G_PROTEIN_SIGNALING	ADCY1, ADCY2, PRKAR1B	0.000705
MSigDB	cluster7	7	CFTRPATHWAY	ADCY1, PRKAR1B	0.000932
MSigDB	cluster7	7	PLCEPATHWAY	ADCY1, PRKAR1B	0.000932
MSigDB	cluster7	7	CALCIUM_REGULATION_IN_CARDIAC_CELLS	ADCY1, ADCY2, PRKAR1B	0.001415
MSigDB	cluster7	7	AMIPATHWAY	ADCY1, PRKAR1B	0.001925
MSigDB	cluster7	7	BADPATHWAY	ADCY1, PRKAR1B	0.001925
MSigDB	cluster7	7	CHREBPPATHWAY	ADCY1, PRKAR1B	0.001925
MSigDB	cluster7	7	CSKPATHWAY	ADCY1, PRKAR1B	0.001925
MSigDB	cluster7	7	MPRPATHWAY	ADCY1, PRKAR1B	0.001925
MSigDB	cluster7	7	CREBPATHWAY	ADCY1, PRKAR1B	0.002251
MSigDB	cluster7	7	GPCRPATHWAY	ADCY1, PRKAR1B	0.003496
Panther	cluster7	7	Endothelin_signaling_pathway	ADCY2, PRKAR1B	0.008836
MSigDB	cluster7	7	HSA04540_GAP_JUNCTION	ADCY1, ADCY2	0.023463
MSigDB	cluster7	7	HSA04912_GNRH_SIGNALING_PATHWAY	ADCY1, ADCY2	0.023463
MSigDB	cluster7	7	PURINE_METABOLISM	ADCY1, ADCY2	0.03089
MSigDB	cluster7	7	HSA00230_PURINE_METABOLISM	ADCY1, ADCY2	0.045392

## Sheet: Gast et al. curated
Pathway	Genes	#genes
EGF	BRAF, ERBB3, GAB2, NRAS, STAT2, STAT6	6
PDGF	BRAF, GAB2, NRAS, STAT2, STAT6	5
ERBB	BRAF, EGFR, ERBB3, NRAS	4
Interleukin signaling	BRAF, NRAS, STAT2, STAT6	4
MAPK (includes regulation of actin cytoskeleton)	BRAF, EGFR, NRAS	3
Angiogenesis (include natural killer cell mediated cytotoxicity, long term potentiation, insulin/VEGF/integrin/Ras signaling)	BRAF, NRAS	2
ERBB3	EGFR, ERBB3	2
FC epsilon RI signaling	GAB2, NRAS	2
GAP junction (include GNRH signaling)	EGFR, NRAS	2
JAK-STAT	STAT2, STAT6	2
Notch	BRAF, EGFR	2

## Sheet: Gast et al non-curated
Pathway database	Protein network modules ID	Size of protein network module	Pathway	Genes	FDR
Panther	cluster0	9	EGF_receptor_signaling_pathway	BRAF, ERBB3, GAB2, NRAS, STAT2, STAT6	0
Panther	cluster0	9	PDGF_signaling_pathway	BRAF, GAB2, NRAS, STAT2, STAT6	0
Panther	cluster0	9	Interleukin_signaling_pathway	BRAF, NRAS, STAT2, STAT6	3e-06
MSigDB	cluster0	9	HSA04012_ERBB_SIGNALING_PATHWAY	BRAF, EGFR, ERBB3, NRAS	4e-05
MSigDB	cluster0	9	HSA05219_BLADDER_CANCER	BRAF, EGFR, NRAS	0.000318
MSigDB	cluster0	9	HSA05213_ENDOMETRIAL_CANCER	BRAF, EGFR, NRAS	0.000337
MSigDB	cluster0	9	HSA05223_NON_SMALL_CELL_LUNG_CANCER	BRAF, EGFR, NRAS	0.000337
MSigDB	cluster0	9	ERBB3PATHWAY	EGFR, ERBB3	0.000374
MSigDB	cluster0	9	HSA05214_GLIOMA	BRAF, EGFR, NRAS	0.000374
MSigDB	cluster0	9	HSA05218_MELANOMA	BRAF, EGFR, NRAS	0.000436
MSigDB	cluster0	9	HSA05220_CHRONIC_MYELOID_LEUKEMIA	BRAF, GAB2, NRAS	0.000468
MSigDB	cluster0	9	HSA05215_PROSTATE_CANCER	BRAF, EGFR, NRAS	0.000622
Panther	cluster0	9	JAK_STAT_signaling_pathway	STAT2, STAT6	0.000939
MSigDB	cluster0	9	HSA04320_DORSO_VENTRAL_AXIS_FORMATION	BRAF, EGFR	0.005286
MSigDB	cluster0	9	HSA05216_THYROID_CANCER	BRAF, NRAS	0.005286
MSigDB	cluster0	9	HSA04810_REGULATION_OF_ACTIN_CYTOSKELETON	BRAF, EGFR, NRAS	0.006539
MSigDB	cluster0	9	ST_ADRENERGIC	BRAF, EGFR	0.006699
MSigDB	cluster0	9	ST_G_ALPHA_I_PATHWAY	BRAF, EGFR	0.006699
Panther	cluster0	9	VEGF_signaling_pathway	BRAF, NRAS	0.007296
Panther	cluster0	9	Ras_Pathway	BRAF, NRAS	0.008823
MSigDB	cluster0	9	HSA04010_MAPK_SIGNALING_PATHWAY	BRAF, EGFR, NRAS	0.009213
MSigDB	cluster0	9	HSA05221_ACUTE_MYELOID_LEUKEMIA	BRAF, NRAS	0.011882
Panther	cluster0	9	Integrin_signalling_pathway	BRAF, NRAS	0.013891
MSigDB	cluster0	9	HSA04720_LONG_TERM_POTENTIATION	BRAF, NRAS	0.017751
MSigDB	cluster0	9	HSA05211_RENAL_CELL_CARCINOMA	BRAF, NRAS	0.017751
MSigDB	cluster0	9	HSA04664_FC_EPSILON_RI_SIGNALING_PATHWAY	GAB2, NRAS	0.018402
MSigDB	cluster0	9	HSA04730_LONG_TERM_DEPRESSION	BRAF, NRAS	0.018402
MSigDB	cluster0	9	HSA05212_PANCREATIC_CANCER	BRAF, EGFR	0.018402
MSigDB	cluster0	9	HSA05210_COLORECTAL_CANCER	BRAF, EGFR	0.021891
MSigDB	cluster0	9	HSA04540_GAP_JUNCTION	EGFR, NRAS	0.026543
MSigDB	cluster0	9	HSA04912_GNRH_SIGNALING_PATHWAY	EGFR, NRAS	0.026543
Panther	cluster0	9	Angiogenesis	BRAF, NRAS	0.033801
MSigDB	cluster0	9	HSA04650_NATURAL_KILLER_CELL_MEDIATED_CYTOTOXICITY	BRAF, NRAS	0.045706
MSigDB	cluster0	9	HSA04910_INSULIN_SIGNALING_PATHWAY	BRAF, NRAS	0.045925

## Sheet: Valsesia et al curated
Pathway	Melanomas	#Melanomas	Genes	#genes
G protein signaling	LAU-Me235, LAU-Me246, LAU-Me275, LAU-Me280, LAU-T149D, LAU-T50B	6	ADORA1, ADRA2A, CHRM1, CHRM5, DRD2, GNAO1, GNB3, GNG4, HTR1F, OPRL1, PLCB2, RGS10, RGS11, RGS14, RGS19	15
WNT signaling (includes Apoptosis and Hedgehog signaling)	LAU-Me246, LAU-Me275, LAU-Me280, LAU-T149D, LAU-T50B, LAU-T618A	6	CDH19, CDH2, CDH4, DVL1, FRAT1, FZD8, PCDH17, PCDH9, SFRP1, WNT11, WNT16, WNT2B, WNT4, WNT5B	14
Cadherin signaling	LAU-Me246, LAU-Me275, LAU-Me280, LAU-T149D, LAU-T50B, LAU-T618A	6	ACTG2, CDH19, CDH2, CDH4, FZD8, PCDH17, PCDH9, WNT11, WNT16, WNT2B, WNT4, WNT5B	12
Melanogenesis	LAU-Me246, LAU-Me275, LAU-Me280, LAU-T149D, LAU-T50B, LAU-T618A	6	CAMK2A, CAMK2G, DVL1, FZD8, NRAS, WNT11, WNT16, WNT2B, WNT4, WNT5B	10
Angiogenesis	LAU-Me246, LAU-Me275, LAU-Me280, LAU-T149D, LAU-T618A	5	BRAF, DVL1, EFNB2, EPHA3, EPHB2, FGF1, FRS2, NRAS, PIK3R3, PRKCZ, SFRP1, WNT2B, WNT5B	13
Axon guidance (migration and adhesion)	LAU-Me246, LAU-Me275, LAU-Me280, LAU-T149D, LAU-T618A	5	CDK5, EFNB2, EPHA3, EPHB2, EPHB6, FES, NRAS	7
MAPK signaling	LAU-Me246, LAU-Me275, LAU-Me280, LAU-T149D, LAU-T50B	5	DUSP1, DUSP12, DUSP2, FGF1, FGF14, FGFR4, MAPK9	7
TGF beta signaling	LAU-Me246, LAU-Me275, LAU-Me280, LAU-T149D, LAU-T50B	5	ACVRL1, AMHR2, FOXH1, LEFTY1, SMAD9, TGFB1, TLL2	7
Alzheimer disease	LAU-Me246, LAU-Me275, LAU-Me280, LAU-T50B, LAU-T618A	5	CHRM1, CHRM5, PKN3, PRKCZ	4
FGF signaling	LAU-Me246, LAU-Me275, LAU-Me280, LAU-T149D, LAU-T50B	5	FGF1, FGF14, FGFR4, FRS2	4
Calcium signalling	LAU-Me246, LAU-Me275, LAU-Me280, LAU-T50B	4	CAMK2A, CAMK2G, CHRM1, CHRM5, GNAO1, GRIN2C, PRKCZ, RGS10, RGS11, RGS14, RGS19	11
Huntington_disease (vesicle-mediated transport)	LAU-Me246, LAU-Me275, LAU-Me280, LAU-T50B	4	ACTG2, CLTB, GRIN2B, GRIN2C, GRIN3A, KALRN	6
Neuroreceptor (Muscarinic, Metabotropic)	LAU-Me246, LAU-Me275, LAU-Me280, LAU-T618A	4	GRIN2B, GRIN2C, GRIN3A, KCNQ2, PKN3, PRKCZ	6
Cell cycle (G1 progression)	LAU-Me246, LAU-Me275, LAU-T149D, LAU-T618A	4	CCNA1, CDC20, CDC26, CDKN2B, HDAC1	5
Long term potentiation	LAU-Me275, LAU-Me280, LAU-T618A	3	BRAF, CAMK2A, CAMK2G, GRIN2B, GRIN2C, NRAS	6
ERBB signaling	LAU-Me275, LAU-Me280, LAU-T618A	3	BRAF, CAMK2A, CAMK2G, NRAS, PIK3R3	5
EGF signaling	LAU-Me275, LAU-Me280, LAU-T618A	3	BRAF, DAB2IP, NRAS, PRKCZ	4
VEGF/Insulin signaling	LAU-Me275, LAU-Me280, LAU-T618A	3	BRAF, NRAS, PIK3R3, PRKCZ	4
FAS signaling	LAU-Me275, LAU-Me280, LAU-T618A	3	CAPG, GSN, SCIN	3
Natural killer cell mediated cytotoxicity (including Integrin signaling, PDGF, T cell activation, Ras, p53 feedback loop)	LAU-Me275, LAU-Me280, LAU-T618A	3	BRAF, NRAS, PIK3R3	3
Parkinson disease (response to unfolded proteins)	LAU-Me275, LAU-Me280, LAU-T149D	3	GPR37, HSPA6, UBE2J2	3
Regulation of actin cytoskeleton	LAU-Me246, LAU-Me280, LAU-T50B	3	FGF1, FGF14, FGFR4	3
Tumor necrosis factor receptor (and Apoptosis)	LAU-Me235, LAU-T618A	2	TANK, TNFRSF1B, TRAF1, TRAF2	4
Glucolysis and Gluconeogenesis	LAU-Me275, LAU-Me280	2	BPGM, GAPDH, PGK1	3
GTPase activating biopeptides	LAU-Me275, LAU-Me280	2	CAMK2A, CAMK2G, CDK5	3
Cytoskeletal regulation (microtubules)	LAU-Me275, LAU-T618A	2	TUBB1, TUBB2C	2
Inflammation mediated by chemokine and cytokine	LAU-Me275, LAU-Me280	2	GNB3, PLCB2	2
Ubiquitin proteasome	LAU-Me246, LAU-Me275	2	UBA3, UBE2E2	2

## Sheet: Valsesia et al non-curated
Pathway database	Protein network modules ID	Size of protein network module	Pathway	Melanomas	#Melanomas	Genes	FDR
MSigDB	cluster0	29	HSA04360_AXON_GUIDANCE	LAU-Me246, LAU-Me275, LAU-Me280, LAU-T149D, LAU-T618A	5	CDK5, EFNB2, EPHA3, EPHB2, EPHB6, FES, NRAS	0
MSigDB	cluster0	29	HSA04720_LONG_TERM_POTENTIATION	LAU-Me275, LAU-Me280, LAU-T618A	3	BRAF, CAMK2A, CAMK2G, GRIN2B, GRIN2C, NRAS	0
Panther	cluster0	29	Angiogenesis	LAU-Me275, LAU-Me280, LAU-T149D, LAU-T618A	4	BRAF, EFNB2, EPHA3, EPHB2, NRAS, PIK3R3, PRKCZ	0
Panther	cluster0	29	Muscarinic_acetylcholine_receptor_1_and_3_signaling_pathway	LAU-Me246, LAU-Me275, LAU-Me280, LAU-T618A	4	GRIN2B, GRIN2C, GRIN3A, KCNQ2, PKN3, PRKCZ	0
MSigDB	cluster0	29	HSA05214_GLIOMA	LAU-Me275, LAU-Me280, LAU-T618A	3	BRAF, CAMK2A, CAMK2G, NRAS, PIK3R3	8e-06
MSigDB	cluster0	29	HSA04012_ERBB_SIGNALING_PATHWAY	LAU-Me275, LAU-Me280, LAU-T618A	3	BRAF, CAMK2A, CAMK2G, NRAS, PIK3R3	2.6e-05
Panther	cluster0	29	VEGF_signaling_pathway	LAU-Me275, LAU-Me280, LAU-T618A	3	BRAF, NRAS, PIK3R3, PRKCZ	3.6e-05
Panther	cluster0	29	Huntington_disease	LAU-Me246, LAU-Me275, LAU-Me280	3	GRIN2B, GRIN2C, GRIN3A, KALRN	7.1e-05
Panther	cluster0	29	Metabotropic_glutamate_receptor_group_I_pathway	LAU-Me246, LAU-Me280	2	GRIN2B, GRIN2C, GRIN3A	7.8e-05
Panther	cluster0	29	EGF_receptor_signaling_pathway	LAU-Me275, LAU-Me280, LAU-T618A	3	BRAF, DAB2IP, NRAS, PRKCZ	0.000372
Panther	cluster0	29	Ionotropic_glutamate_receptor_pathway	LAU-Me246, LAU-Me280	2	GRIN2B, GRIN2C, GRIN3A	0.000442
Panther	cluster0	29	Metabotropic_glutamate_receptor_group_III_pathway	LAU-Me246, LAU-Me280	2	GRIN2B, GRIN2C, GRIN3A	0.000528
Panther	cluster0	29	Axon_guidance_mediated_by_semaphorins	LAU-Me246, LAU-Me280	2	CDK5, FES	0.002206
Panther	cluster0	29	Integrin_signalling_pathway	LAU-Me275, LAU-Me280, LAU-T618A	3	BRAF, NRAS, PIK3R3	0.003133
MSigDB	cluster0	29	BIOPEPTIDESPATHWAY	LAU-Me275, LAU-Me280	2	CAMK2A, CAMK2G, CDK5	0.003361
MSigDB	cluster0	29	HSA04910_INSULIN_SIGNALING_PATHWAY	LAU-Me275, LAU-Me280, LAU-T618A	3	BRAF, NRAS, PIK3R3, PRKCZ	0.004585
MSigDB	cluster0	29	HSA05213_ENDOMETRIAL_CANCER	LAU-Me275, LAU-Me280, LAU-T618A	3	BRAF, NRAS, PIK3R3	0.005496
MSigDB	cluster0	29	HSA05223_NON_SMALL_CELL_LUNG_CANCER	LAU-Me275, LAU-Me280, LAU-T618A	3	BRAF, NRAS, PIK3R3	0.005496
Panther	cluster0	29	PDGF_signaling_pathway	LAU-Me275, LAU-Me280, LAU-T618A	3	BRAF, NRAS, PIK3R3	0.007075
MSigDB	cluster0	29	HSA05211_RENAL_CELL_CARCINOMA	LAU-Me275, LAU-Me280, LAU-T618A	3	BRAF, NRAS, PIK3R3	0.009831
MSigDB	cluster0	29	HSA05218_MELANOMA	LAU-Me275, LAU-Me280, LAU-T618A	3	BRAF, NRAS, PIK3R3	0.009831
MSigDB	cluster0	29	HSA05220_CHRONIC_MYELOID_LEUKEMIA	LAU-Me275, LAU-Me280, LAU-T618A	3	BRAF, NRAS, PIK3R3	0.010908
MSigDB	cluster0	29	CACAMPATHWAY	LAU-Me275	1	CAMK2A, CAMK2G	0.011256
MSigDB	cluster0	29	HSA05215_PROSTATE_CANCER	LAU-Me275, LAU-Me280, LAU-T618A	3	BRAF, NRAS, PIK3R3	0.013698
Panther	cluster0	29	p53_pathway_feedback_loops_2	LAU-Me275, LAU-T618A	2	NRAS, PIK3R3	0.015453
MSigDB	cluster0	29	HSA04912_GNRH_SIGNALING_PATHWAY	LAU-Me275, LAU-T618A	2	CAMK2A, CAMK2G, NRAS	0.017458
MSigDB	cluster0	29	HSA04916_MELANOGENESIS	LAU-Me275, LAU-T618A	2	CAMK2A, CAMK2G, NRAS	0.017676
MSigDB	cluster0	29	ST_WNT_CA2_CYCLIC_GMP_PATHWAY	LAU-Me275	1	CAMK2A, CAMK2G	0.017676
MSigDB	cluster0	29	NOS1PATHWAY	LAU-Me280	1	GRIN2B, GRIN2C	0.019007
MSigDB	cluster0	29	PGC1APATHWAY	LAU-Me275	1	CAMK2A, CAMK2G	0.021248
MSigDB	cluster0	29	CREBPATHWAY	LAU-Me275	1	CAMK2A, CAMK2G	0.025295
MSigDB	cluster0	29	HSA05216_THYROID_CANCER	LAU-Me280, LAU-T618A	2	BRAF, NRAS	0.027604
MSigDB	cluster0	29	HSA04650_NATURAL_KILLER_CELL_MEDIATED_CYTOTOXICITY	LAU-Me275, LAU-Me280, LAU-T618A	3	BRAF, NRAS, PIK3R3	0.028345
MSigDB	cluster0	29	HSA04740_OLFACTORY_TRANSDUCTION	LAU-Me275	1	CAMK2A, CAMK2G	0.028562
Panther	cluster0	29	T_cell_activation	LAU-Me275, LAU-Me280	2	BRAF, PIK3R3	0.030726
Panther	cluster0	29	Alzheimer_disease_amyloid_secretase_pathway	LAU-Me275, LAU-T618A	2	PKN3, PRKCZ	0.031799
MSigDB	cluster0	29	CALCIUM_REGULATION_IN_CARDIAC_CELLS	LAU-Me275	1	CAMK2A, CAMK2G, PRKCZ	0.031906
Panther	cluster0	29	Ras_Pathway	LAU-Me280, LAU-T618A	2	BRAF, NRAS	0.032886
Panther	cluster0	29	Endothelin_signaling_pathway	LAU-Me275	1	PIK3R3, PRKCZ	0.032915
MSigDB	cluster0	29	SMOOTH_MUSCLE_CONTRACTION	LAU-Me275	1	CAMK2A, CAMK2G, PRKCZ	0.033681
MSigDB	cluster0	29	ST_G_ALPHA_I_PATHWAY	LAU-Me280, LAU-T149D	2	BRAF, EPHB2	0.033681
MSigDB	cluster0	29	HSA05219_BLADDER_CANCER	LAU-Me280, LAU-T618A	2	BRAF, NRAS	0.043565
MSigDB	cluster0	29	HSA04930_TYPE_II_DIABETES_MELLITUS	LAU-Me275	1	PIK3R3, PRKCZ	0.04591
MSigDB	cluster0	29	HSA04020_CALCIUM_SIGNALING_PATHWAY	LAU-Me275, LAU-Me280	2	CAMK2A, CAMK2G, GRIN2C	0.046738
Panther	cluster1	8	Oxidative_stress_response	LAU-Me275, LAU-T149D, LAU-T50B	3	DUSP12, DUSP2, MAPK9	0.00012
MSigDB	cluster1	8	HSA04010_MAPK_SIGNALING_PATHWAY	LAU-Me275, LAU-T50B	2	DUSP1, DUSP2, MAPK9	0.048818
MSigDB	cluster1	8	SIG_CD40PATHWAYMAP	LAU-T50B	1	DUSP1, MAPK9	0.048818
Panther	cluster11	5	Heterotrimeric_G_protein_signaling_pathway_Gq_and_Go_mediated_pathway	LAU-Me275, LAU-Me280, LAU-T149D	3	GNB3, GNG4, PLCB2	0.000139
Panther	cluster11	5	Inflammation_mediated_by_chemokine_and_cytokine_signaling_pathway	LAU-Me275, LAU-Me280, LAU-T149D	3	GNB3, GNG4, PLCB2	0.000276
MSigDB	cluster11	5	HSA04742_TASTE_TRANSDUCTION	LAU-Me275, LAU-Me280	2	GNB3, PLCB2	0.042604
Panther	cluster15	9	FAS_signaling_pathway	LAU-Me275, LAU-Me280, LAU-T618A	3	CAPG, GSN, SCIN	4.2e-05
Panther	cluster15	9	Cytoskeletal_regulation_by_Rho_GTPase	LAU-Me275, LAU-T618A	2	TUBB1, TUBB2C	0.01562
Panther	cluster15	9	Huntington_disease	LAU-Me275, LAU-T618A	2	TUBB1, TUBB2C	0.01562
Panther	cluster16	6	Parkinson_disease	LAU-Me275, LAU-Me280, LAU-T149D	3	GPR37, HSPA6, UBE2J2	0.000105
MSigDB	cluster16	6	HSA05020_PARKINSONS_DISEASE	LAU-Me275, LAU-Me280	2	GPR37, UBE2J2	0.006853
Panther	cluster18	5	FGF_signaling_pathway	LAU-Me246, LAU-Me275, LAU-Me280, LAU-T149D, LAU-T50B	5	FGF1, FGF14, FGFR4, FRS2	0
MSigDB	cluster18	5	HSA04010_MAPK_SIGNALING_PATHWAY	LAU-Me246, LAU-Me280, LAU-T50B	3	FGF1, FGF14, FGFR4	0.006031
MSigDB	cluster18	5	HSA04810_REGULATION_OF_ACTIN_CYTOSKELETON	LAU-Me246, LAU-Me280, LAU-T50B	3	FGF1, FGF14, FGFR4	0.006031
MSigDB	cluster18	5	HSA05218_MELANOMA	LAU-Me246, LAU-Me280	2	FGF1, FGF14	0.025322
Panther	cluster18	5	Angiogenesis	LAU-Me246, LAU-Me275, LAU-T149D	3	FGF1, FRS2	0.030692
MSigDB	cluster2	9	TNFR2PATHWAY	LAU-Me235, LAU-T618A	2	TANK, TNFRSF1B, TRAF1, TRAF2	0
MSigDB	cluster2	9	APOPTOSIS_GENMAPP	LAU-Me235, LAU-T618A	2	TNFRSF1B, TRAF1, TRAF2	0.000255
MSigDB	cluster2	9	APOPTOSIS_KEGG	LAU-Me235, LAU-T618A	2	TNFRSF1B, TRAF1, TRAF2	0.000255
MSigDB	cluster2	9	GLUCONEOGENESIS	LAU-Me275, LAU-Me280	2	BPGM, GAPDH, PGK1	0.000255
MSigDB	cluster2	9	GLYCOLYSIS	LAU-Me275, LAU-Me280	2	BPGM, GAPDH, PGK1	0.000255
MSigDB	cluster2	9	HIVNEFPATHWAY	LAU-Me235, LAU-T618A	2	TNFRSF1B, TRAF1, TRAF2	0.000278
MSigDB	cluster2	9	HSA00010_GLYCOLYSIS_AND_GLUCONEOGENESIS	LAU-Me275, LAU-Me280	2	BPGM, GAPDH, PGK1	0.00032
MSigDB	cluster2	9	APOPTOSIS	LAU-Me235, LAU-T618A	2	TNFRSF1B, TRAF1, TRAF2	0.000351
Panther	cluster2	9	Glycolysis	LAU-Me275, LAU-Me280	2	BPGM, PGK1	0.00047
MSigDB	cluster2	9	SODDPATHWAY	LAU-Me235, LAU-T618A	2	TNFRSF1B, TRAF2	0.000821
MSigDB	cluster2	9	STRESSPATHWAY	LAU-T618A	1	TANK, TRAF2	0.004349
MSigDB	cluster2	9	ST_TUMOR_NECROSIS_FACTOR_PATHWAY	LAU-Me235, LAU-T618A	2	TNFRSF1B, TRAF2	0.005286
MSigDB	cluster2	9	GLYCOLYSIS_AND_GLUCONEOGENESIS	LAU-Me275	1	GAPDH, PGK1	0.010986
MSigDB	cluster2	9	KERATINOCYTEPATHWAY	LAU-Me235, LAU-T618A	2	TNFRSF1B, TRAF2	0.011067
MSigDB	cluster2	9	HSA04920_ADIPOCYTOKINE_SIGNALING_PATHWAY	LAU-Me235, LAU-T618A	2	TNFRSF1B, TRAF2	0.024817
MSigDB	cluster2	9	HSA05222_SMALL_CELL_LUNG_CANCER	LAU-T618A	1	TRAF1, TRAF2	0.033608
MSigDB	cluster23	10	HSA04310_WNT_SIGNALING_PATHWAY	LAU-Me246, LAU-Me275, LAU-Me280, LAU-T149D, LAU-T50B, LAU-T618A	6	DVL1, FRAT1, FZD8, SFRP1, WNT11, WNT16, WNT2B, WNT4, WNT5B	0
MSigDB	cluster23	10	HSA04340_HEDGEHOG_SIGNALING_PATHWAY	LAU-Me275, LAU-Me280, LAU-T149D, LAU-T50B, LAU-T618A	5	WNT11, WNT16, WNT2B, WNT4, WNT5B	0
MSigDB	cluster23	10	HSA04916_MELANOGENESIS	LAU-Me246, LAU-Me275, LAU-Me280, LAU-T149D, LAU-T50B, LAU-T618A	6	DVL1, FZD8, WNT11, WNT16, WNT2B, WNT4, WNT5B	0
MSigDB	cluster23	10	HSA05217_BASAL_CELL_CARCINOMA	LAU-Me246, LAU-Me275, LAU-Me280, LAU-T149D, LAU-T50B, LAU-T618A	6	DVL1, FZD8, WNT11, WNT16, WNT2B, WNT4, WNT5B	0
MSigDB	cluster23	10	WNT_SIGNALING	LAU-Me246, LAU-Me275, LAU-Me280, LAU-T149D, LAU-T50B, LAU-T618A	6	DVL1, FRAT1, FZD8, WNT11, WNT16, WNT2B, WNT4, WNT5B	0
Panther	cluster23	10	Alzheimer_disease_presenilin_pathway	LAU-Me246, LAU-Me275, LAU-Me280, LAU-T149D, LAU-T50B, LAU-T618A	6	DVL1, FZD8, WNT11, WNT16, WNT2B, WNT4, WNT5B	0
Panther	cluster23	10	Cadherin_signaling_pathway	LAU-Me246, LAU-Me275, LAU-Me280, LAU-T149D, LAU-T50B, LAU-T618A	6	FZD8, WNT11, WNT16, WNT2B, WNT4, WNT5B	0
Panther	cluster23	10	Wnt_signaling_pathway	LAU-Me246, LAU-Me275, LAU-Me280, LAU-T149D, LAU-T50B, LAU-T618A	6	DVL1, FZD8, SFRP1, WNT11, WNT16, WNT2B, WNT4, WNT5B	0
Panther	cluster23	10	Angiogenesis	LAU-Me275, LAU-T618A	2	DVL1, SFRP1, WNT2B, WNT5B	1.3e-05
MSigDB	cluster23	10	ST_WNT_BETA_CATENIN_PATHWAY	LAU-Me246, LAU-Me275, LAU-T50B	3	DVL1, FRAT1, SFRP1	5.6e-05
MSigDB	cluster23	10	WNTPATHWAY	LAU-Me246, LAU-Me275, LAU-T50B	3	DVL1, FRAT1	0.006708
Panther	cluster25	12	Cadherin_signaling_pathway	LAU-Me275, LAU-Me280, LAU-T50B, LAU-T618A	4	ACTG2, CDH19, CDH2, CDH4, PCDH17, PCDH9	0
Panther	cluster25	12	Wnt_signaling_pathway	LAU-Me275, LAU-Me280, LAU-T50B, LAU-T618A	4	CDH19, CDH2, CDH4, PCDH17, PCDH9	5e-06
Panther	cluster25	12	Huntington_disease	LAU-Me275, LAU-T50B	2	ACTG2, CLTB	0.02847
Panther	cluster29	5	ubiquitin_proteasome_pathway	LAU-Me246, LAU-Me275	2	UBA3, UBE2E2	0.005504
MSigDB	cluster5	46	HSA04110_CELL_CYCLE	LAU-Me246, LAU-Me275, LAU-T149D, LAU-T618A	4	CCNA1, CDC20, CDC26, CDKN2B, HDAC1	0.00511
MSigDB	cluster5	46	G1PATHWAY	LAU-Me246, LAU-Me275, LAU-T149D	3	CCNA1, CDKN2B, HDAC1	0.014001
Panther	cluster7	13	TGF_beta_signaling_pathway	LAU-Me246, LAU-Me275, LAU-Me280, LAU-T149D, LAU-T50B	5	ACVRL1, AMHR2, FOXH1, LEFTY1, SMAD9, TGFB1, TLL2	0
MSigDB	cluster7	13	HSA04350_TGF_BETA_SIGNALING_PATHWAY	LAU-Me275, LAU-Me280, LAU-T149D	3	ACVRL1, AMHR2, LEFTY1, SMAD9, TGFB1	2e-06
MSigDB	cluster9	16	CALCIUM_REGULATION_IN_CARDIAC_CELLS	LAU-Me246, LAU-Me275, LAU-Me280, LAU-T50B	4	CHRM1, CHRM5, GNAO1, RGS10, RGS11, RGS14, RGS19	0
MSigDB	cluster9	16	GPCRDB_CLASS_A_RHODOPSIN_LIKE	LAU-Me235, LAU-Me246, LAU-Me275, LAU-Me280, LAU-T149D, LAU-T50B	6	ADORA1, ADRA2A, CHRM1, CHRM5, DRD2, HTR1F, OPRL1	0
MSigDB	cluster9	16	HSA04080_NEUROACTIVE_LIGAND_RECEPTOR_INTERACTION	LAU-Me235, LAU-Me246, LAU-Me275, LAU-Me280, LAU-T149D, LAU-T50B	6	ADORA1, ADRA2A, CHRM1, CHRM5, DRD2, HTR1F, OPRL1	0
MSigDB	cluster9	16	MONOAMINE_GPCRS	LAU-Me235, LAU-Me246, LAU-Me275, LAU-Me280, LAU-T50B	5	ADRA2A, CHRM1, CHRM5, DRD2, HTR1F	0
Panther	cluster9	16	Heterotrimeric_G_protein_signaling_pathway_Gi_and_Gs_mediated_pathway	LAU-Me235, LAU-Me246, LAU-Me275, LAU-Me280, LAU-T149D, LAU-T50B	6	ADORA1, CHRM1, CHRM5, DRD2, HTR1F, OPRL1, RGS10, RGS11, RGS14, RGS19	0
Panther	cluster9	16	Heterotrimeric_G_protein_signaling_pathway_Gq_and_Go_mediated_pathway	LAU-Me235, LAU-Me246, LAU-Me275, LAU-Me280, LAU-T149D, LAU-T50B	6	ADORA1, CHRM1, CHRM5, DRD2, GNAO1, OPRL1, RGS10, RGS11, RGS14, RGS19	0
MSigDB	cluster9	16	SMOOTH_MUSCLE_CONTRACTION	LAU-Me275, LAU-Me280, LAU-T50B	3	RGS10, RGS11, RGS14, RGS19	0.000579
Panther	cluster9	16	Alzheimer_disease_amyloid_secretase_pathway	LAU-Me246, LAU-Me280, LAU-T50B	3	CHRM1, CHRM5	0.041944
